# Supplementary material for: The preparation of [1,2,4]triazolo[1,5-a]pyrimidines catalyzed by Schiff base zinc(ii) complex supported on magnetite nanoparticles under mild conditions
Source: Royal Society of Chemistry journal article supplement (doi:10.1039/d4ra02339k), 2024-01-01

# Supporting Information

## The preparation of [1,2,4]Triazolo[1,5-*a*]pyrimidines catalyzed by Schiff base zinc (II) complex supported on magnetite nanoparticles under mild condition

Ahmad Reza Moosavi-Zare,\* Raha Najafi, Hamid Goudarziafshar

<sup>a</sup>Department of Chemical Engineering, Hamedan University of Technology, Hamedan,65155,

Iran .

\*E-mail: [moosavizare@yahoo.com](mailto:moosavizare@yahoo.com)

### Spectral data of compounds:

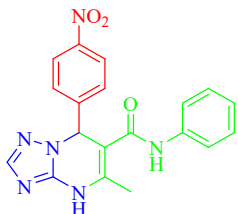

#### 5-methyl-7-(4-nitrophenyl)-N-phenyl-4,7-dihydro-[1,2,4]triazolo[1,5-a]pyrimidine-6-carboxamide

White Solid; M.p: 259-261 °C; IR (KBr,  $\text{cm}^{-1}$ ): 3255, 3101, 2915, 1667, 1621, 1596, 1247, 825, 749, 545;  $^1\text{H}$  NMR (250 MHz,  $\text{DMSO}-d_6$ ):  $\delta$  2.17 (s, 3H,  $\text{CH}_3$ ), 6.66 (s, 1H, H-benzylic), 6.99 (s, 1H), 7.22 (s, 2H, ArH), 7.47 (d,  $J = 6.25$  Hz, 4H, ArH), 7.67 (s, 1H, ArH), 8.16 (d,  $J = 6.75$  Hz, 2H, ArH), 9.78 (s, 1H, NH), 10.39 (s, 1H, NH);  $^{13}\text{C}$ -NMR ( $\text{DMSO}-d_6$ , 62.5 MHz):  $\delta$  25.4, 60.0, 103.0, 120.1, 123.8, 124.2, 129.0, 130.0, 137.8, 138.4, 139.2, 147.6, 148.0, 148.3, 149.2, 150.7, 165.0.

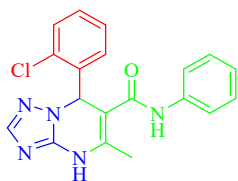

#### 7-(2-chlorophenyl)-5-methyl-N-phenyl-4,7-dihydro-[1,2,4]triazolo[1,5-a]pyrimidine-6-carboxamide

White Solid; M.p: 252-254 °C; IR (KBr,  $\text{cm}^{-1}$ ): 3414, 3299, 3098, 3037, 2866, 1670, 1636, 1595, 1499, 1328, 1262, 975, 872, 750, 546;  $^1\text{H}$  NMR (250 MHz,  $\text{DMSO}-d_6$ ):  $\delta$  2.14 (s, 3H,  $\text{CH}_3$ ), 6.92 (s, 1H), 6.97 (s, 1H), 7.27 (s, 5H, ArH), 7.44 (s, 3H, ArH), 7.60 (s, 1H, ArH), 9.81 (s, 1H, NH),

10.28 (s, 1H, NH);  $^{13}\text{C}$ -NMR (DMSO- $d_6$ , 62.5 MHz):  $\delta$  17.5, 58.2, 103.2, 119.9, 123.7, 128.0, 129.0, 130.3, 130.5, 132.5, 137.2, 138.1, 139.3, 148.3, 150.4, 165.0.

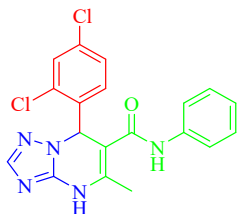

**7-(2,4-dichlorophenyl)-5-methyl-N-phenyl-4,7-dihydro-[1,2,4]triazolo[1,5-a]pyrimidine-6-carboxamide**

White Solid; M.p: 248-250 °C; IR (KBr,  $\text{cm}^{-1}$ ): 3414, 3304, 3095, 3027, 1739, 1670, 1533, 1491, 1332, 1260, 857, 759, 547;  $^1\text{H}$  NMR (250 MHz, DMSO- $d_6$ ): 2.13 (s, 3H, CH<sub>3</sub>), 6.88 (s, 1H, H-benzylic), 6.98 (s, 1H, ArH), 7.21 (s, 2H, ArH), 7.30 (d,  $J=7.30$  Hz, 1H, ArH), 7.36 (s, 1H, ArH), 7.45 (s, 3H, ArH), 7.52 (s, 1H, ArH), 7.61 (s, 1H, ArH), 9.82 (s, 1H, NH), 10.33 (s, 1H, NH);  $^{13}\text{C}$  NMR (DMSO- $d_6$ , 62.5 MHz):  $\delta$  17.6, 57.8, 59.1, 102.7, 119.9, 123.8, 128.3, 129.0, 129.5, 131.9, 133.6, 134.0, 137.5, 139.3, 148.3, 150.6, 164.9.

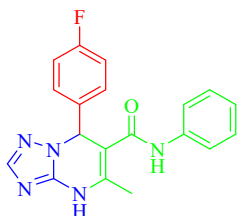

**7-(4-fluorophenyl)-5-methyl-N-phenyl-4,7-dihydro-[1,2,4]triazolo[1,5-a]pyrimidine-6-carboxamide**

White Solid; M.p: 276-278 °C; IR (KBr,  $\text{cm}^{-1}$ ): 3270, 3102, 2977, 1663, 1627, 1595, 1509, 1325, 1231, 977, 839, 747, 516;  $^1\text{H}$  NMR (250 MHz, DMSO- $d_6$ ):  $\delta$  2.16 (s, 3H, CH<sub>3</sub>), 6.53 (s, 1H), 6.95-7.01 (m, 1H), 7.10 (d,  $J=8.00$  Hz, 2H, ArH), 7.15 (s, 1H), 7.24 (d,  $J=6.75$  Hz, 3H, ArH), 7.48 (d,  $J=7.5$  Hz, 2H, ArH), 7.63 (s, 1H, ArH), 9.73 (s, 1H, NH), 10.24 (s, 1H, NH);  $^{13}\text{C}$ -NMR

(DMSO-*d*<sub>6</sub>, 62.5 MHz):  $\delta$  17.7, 60.0, 103.8, 115.5, 115.9, 120.0, 123.7, 129.0, 129.7, 137.1, 137.4, 139.3, 148.2, 150.4, 165.2.

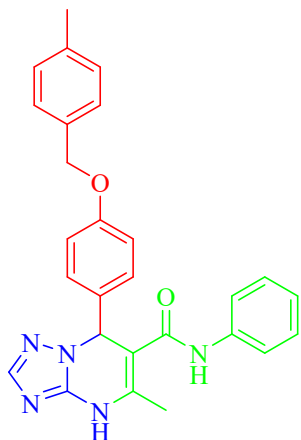

**5-methyl-7-(4-((4-methylbenzyl)oxy)phenyl)-N-phenyl-4,7-dihydro-[1,2,4]triazolo[1,5-a]pyrimidine-6-carboxamide**

White Solid; M.p: 232-234°C; IR (KBr, cm<sup>-1</sup>): 3445, 3271, 3101, 3027, 2920, 2869, 1667, 1626, 1596, 1510, 1441, 1330, 1243, 1010, 750, 728, 691 ; <sup>1</sup>H NMR (250 MHz, DMSO-*d*<sub>6</sub>):  $\delta$  2.16 (s, 3H, CH<sub>3</sub>), 2.26 (s, 3H, CH<sub>3</sub>), 4.95 (s, 2H), 6.47 (s, 1H), 6.89 (d, *J* = 7.00 Hz, 2H, ArH), 7.00 (d, *J* = 6.50 Hz, 2H, ArH), 7.14 (d, *J* = 5.75 Hz, 2H, ArH), 7.19 (s, 1H, ArH), 7.24 (s, 3H, ArH), 7.49 (d, *J* = 6.75 Hz, 3H, ArH), 7.60 (s, 1H, ArH), 9.70 (s, 1H, NH), 10.15 (s, 1H, NH); <sup>13</sup>C-NMR (DMSO-*d*<sub>6</sub>, 62.5 MHz):  $\delta$  17.7, 21.1, 60.1, 69.5, 104.1, 115.0, 120.0, 123.7, 128.2, 128.8, 129.0, 129.3, 133.4, 134.3, 136.8, 137.5, 139.4, 150.2, 158.6, 165.4; MS: *m/z* = 451.

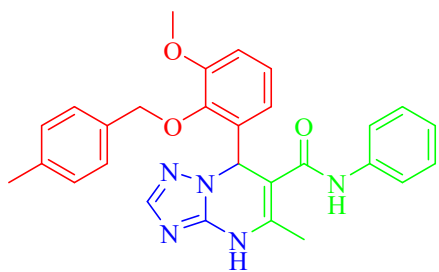

**7-(3-methoxy-2-((4-methylbenzyl)oxy)phenyl)-5-methyl-N-phenyl-4,7-dihydro-[1,2,4]triazolo[1,5-a]pyrimidine-6-carboxamide**

White Solid; M.p: 241-243°C; IR (KBr,  $\text{cm}^{-1}$ ): 3407, 3274, 3134, 3055, 2890, 1595, 1670, 1589, 1529, 1481, 1314, 1224, 1070, 766 ;  $^1\text{H}$  NMR (250 MHz,  $\text{DMSO-}d_6$ ):  $\delta$  2.12 (s, 3H,  $\text{CH}_3$ ), 2.30 (s, 3H,  $\text{CH}_3$ ), 3.76 (s, 3H,  $\text{CH}_3$ ), 4.73 (d,  $J = 10.25$  Hz, 1H, ArH), 5.01 (d,  $J = 10.25$  Hz, 1H), 6.78-6.84 (m, 2H, ArH), 6.95 (s, 2H, ArH), 7.00 (s, 1H, ArH), 7.18 (s, 3H, ArH), 7.38 (d,  $J = 7.00$  Hz, 2H, ArH), 7.46 (d,  $J = 7.50$  Hz, 2H, ArH), 7.56 (s, 1H, ArH), 9.72 (s, 1H, NH), 10.09 (s, 1H, NH);  $^{13}\text{C}$ -NMR ( $\text{DMSO-}d_6$ , 62.5 MHz):  $\delta$  17.6, 21.2, 56.1, 74.4, 104.2, 112.9, 119.8, 120.6, 123.6, 124.7, 128.5, 128.9, 129.1, 134.7, 135.3, 136.5, 137.3, 139.4, 150.1, 152.7. MS:  $m/z = 481.5$ .

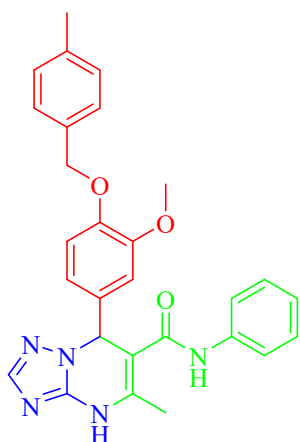

**7-(3-methoxy-4-((4-methylbenzyl)oxy)phenyl)-5-methyl-N-phenyl-4,7-dihydro-[1,2,4]triazolo[1,5-a]pyrimidine-6-carboxamide**

White Solid; M. p: 246-248°C; IR (KBr,  $\text{cm}^{-1}$ ): 3277, 3098, 3027, 2918, 1673, 1628, 1596, 1515, 1441, 1262, 1003, 754 ;  $^1\text{H}$  NMR (250 MHz,  $\text{DMSO-}d_6$ ):  $\delta$  2.15 (s, 3H,  $\text{CH}_3$ ), 2.26 (s, 3H,  $\text{CH}_3$ ), 3.62 (s, 3H,  $\text{CH}_3$ ), 4.93 (s, 2H), 6.45 (s, 1H), 6.68 (d,  $J = 8.00$  Hz, 1H, ArH), 6.81 (s, 1H, ArH), 6.90-7.02 (m, 2H, ArH), 7.13 (d,  $J = 7.50$  Hz, 2H, ArH), 7.20 (s, 1H, ArH), 7.25 (d,  $J = 7.50$  Hz,

2H, ArH), 7.34 (s, 1H, ArH), 7.50 (d,  $J = 7.75$  Hz, 2H, ArH), 7.62 (s, 1H, ArH), 9.70 (s, 1H, NH), 10.15 (s, 1H, NH);  $^{13}\text{C}$ -NMR (DMSO- $d_6$ , 62.5 MHz):  $\delta$  17.7, 21.2, 56.0, 60.3, 70.2, 104.0, 111.6, 113.7, 120.0, 123.7, 128.3, 129.0, 129.3, 133.8, 134.4, 136.8, 137.5, 139.4, 148.1, 149.2, 150.2, 165.4; MS:  $m/z = 481.6$ .

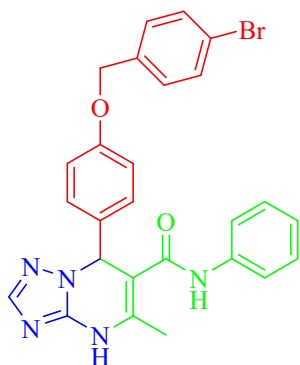

**7-(4-((4-bromobenzyl)oxy)phenyl)-5-methyl-N-phenyl-4,7-dihydro-[1,2,4]triazolo[1,5-a]pyrimidine-6-carboxamide**

White Solid; M.p: 237-239°C; IR (KBr,  $\text{cm}^{-1}$ ): 3406, 3262, 3103, 2925, 1754, 1665, 1626, 1595, 1509, 1440, 1321, 1242, 1011, 752 ;  $^1\text{H}$  NMR (250 MHz, DMSO- $d_6$ ):  $\delta$  2.15 (s, 3H,  $\text{CH}_3$ ), 4.99 (s, 2H), 6.47 (s, 1H), 6.91 (s, 2H, ArH), 6.98 (s, 2H, ArH), 7.14 (d,  $J = 7.00$  Hz, 2H, ArH), 7.22 (s, 2H, ArH), 7.35 (s, 3H, ArH), 7.51-7.59 (m, 4H, ArH), 9.69 (s, 1H, NH), 10.15 (s, 1H, NH);  $^{13}\text{C}$ -NMR (DMSO- $d_6$ , 62.5 MHz):  $\delta$  17.7, 60.1, 68.8, 104.1, 115.0, 120.0, 121.3, 123.7, 129.0, 130.2, 131.7, 133.6, 136.8, 139.4, 158.3, 165.4.

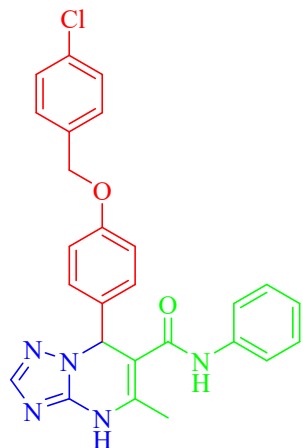

**7-(4-((4-chlorobenzyl)oxy)phenyl)-5-methyl-N-phenyl-4,7-dihydro-[1,2,4]triazolo[1,5-a]pyrimidine-6-carboxamide**

White Solid; M.p: 237-239 °C; IR (KBr,  $\text{cm}^{-1}$ ): 3263, 3101, 3032, 2925, 1665, 1626, 1595, 1510, 1440, 1329, 1249, 1014, 752;  $^1\text{H}$  NMR (250 MHz,  $\text{DMSO}-d_6$ ):  $\delta$  2.15 (s, 3H,  $\text{CH}_3$ ), 5.01 (s, 2H), 6.47 (s, 1H), 6.91 (d,  $J = 7.50$  Hz, 2H, ArH), 6.98 (s, 1H, ArH), 7.15 (d,  $J = 7.75$  Hz, 2H, ArH), 7.21 (d,  $J = 7.25$  Hz, 2H, ArH), 7.40 (s, 4H, ArH), 7.49 (d,  $J = 7.25$  Hz, 2H, ArH), 7.60 (s, 1H, ArH), 9.69 (s, 1H, NH), 10.15 (s, 1H, NH);  $^{13}\text{C}$ -NMR ( $\text{DMSO}-d_6$ , 62.5 MHz):  $\delta$  17.7, 60.0, 68.7, 115.0, 119.9, 123.7, 128.8, 129.9, 133.6, 139.4, 150.2, 158.4, 165.4; MS:  $m/z = 477.4$ .

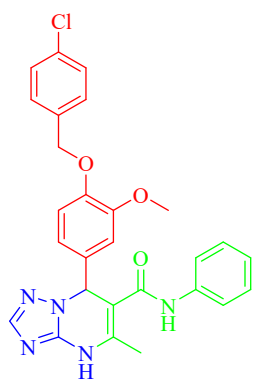

**7-(4-((4-chlorobenzyl)oxy)-3-methoxyphenyl)-5-methyl-N-phenyl-4,7-dihydro-[1,2,4]triazolo[1,5-a]pyrimidine-6-carboxamide**

White Solid; M.p: 256-258 °C; IR (KBr,  $\text{cm}^{-1}$ ): 3263, 3103, 2917, 2865, 1667, 1626, 1509, 1596, 1515, 1440, 1330, 1228, 1031, 874, 753, 541;  $^1\text{H}$  NMR (250 MHz,  $\text{DMSO-}d_6$ ):  $\delta$  2.15 (s, 3H,  $\text{CH}_3$ ), 3.63 (s, 3H,  $\text{CH}_3$ ), 4.98 (s, 2H), 6.46 (s, 1H), 6.69 (d,  $J = 7.00$  Hz, 1H, ArH), 6.82 (s, 1H, ArH), 6.90-6.98 (m, 2H, ArH), 7.23 (s, 2H, ArH), 7.39 (s, 4H, ArH), 7.50 (d,  $J = 6.75$  Hz, 2H, ArH), 7.62 (s, 1H, ArH), 9.70 (s, 1H, NH), 10.15 (s, 1H, NH);  $^{13}\text{C}$ -NMR ( $\text{DMSO-}d_6$ , 62.5 MHz):  $\delta$  17.7, 56.0, 60.3, 69.5, 104.0, 111.7, 113.9, 119.9, 123.7, 128.8, 129.0, 129.9, 132.8, 134.1, 136.5, 136.8, 139.4, 147.9, 149.2, 150.2, 165.4; MS:  $m/z = 507.5$ .



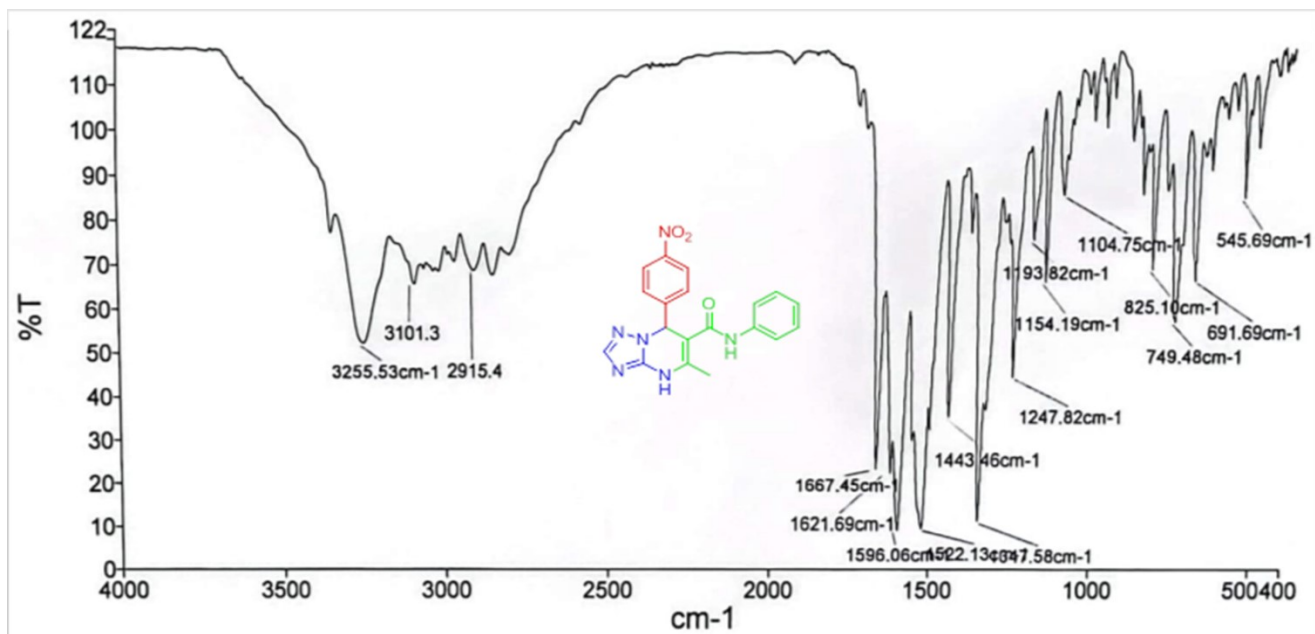

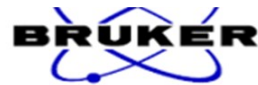

Current Data Parameters  
NAME Hamadan-6  
EXPNO 561  
PROCNO 1

F2 - Acquisition Parameters  
Date 20210302  
Time 18.19  
INSTRUM spect  
PROBHD 5 mm Multinucl  
PULPROG zg  
TD 16384  
SOLVENT DMSO  
NS 16  
DS 0  
SWH 6265.664 Hz  
FIDRES 0.382426 Hz  
AQ 1.3074932 sec  
RG 32  
DW 79.800 usec  
DE 6.00 usec  
TE 300.0 K  
D1 2.0000000 sec

----- CHANNEL f1 -----  
NUC1 1H  
P1 9.00 usec  
PL1 3.00 dB  
SFO1 250.1320010 MHz

F2 - Processing parameters  
SI 32768  
SF 250.1300000 MHz  
WDW EM  
SSB 0  
LB 1.00 Hz  
GB 0  
PC 1.00

10.395  
9.965  
9.781  
8.183  
8.156  
7.808  
7.678  
7.487  
7.462  
7.345  
7.317  
7.224  
6.990  
6.832  
6.666  
5.201  
5.157  
4.338  
3.336  
3.198  
3.155  
2.478  
2.303  
2.177  
1.819  
1.698  
1.032

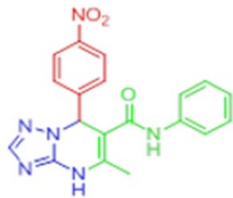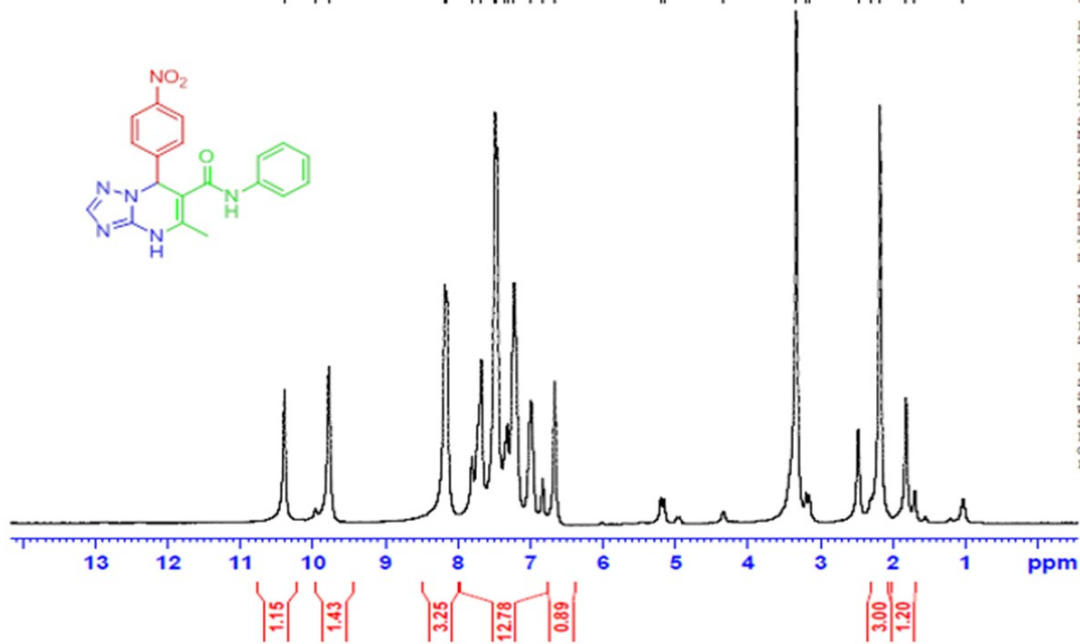

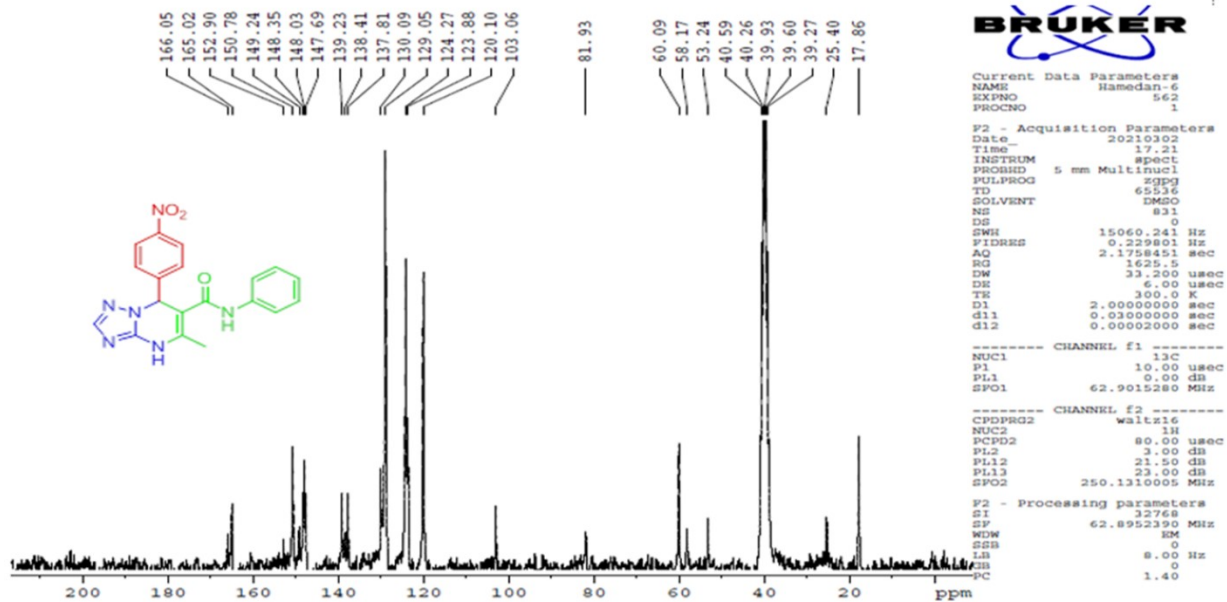

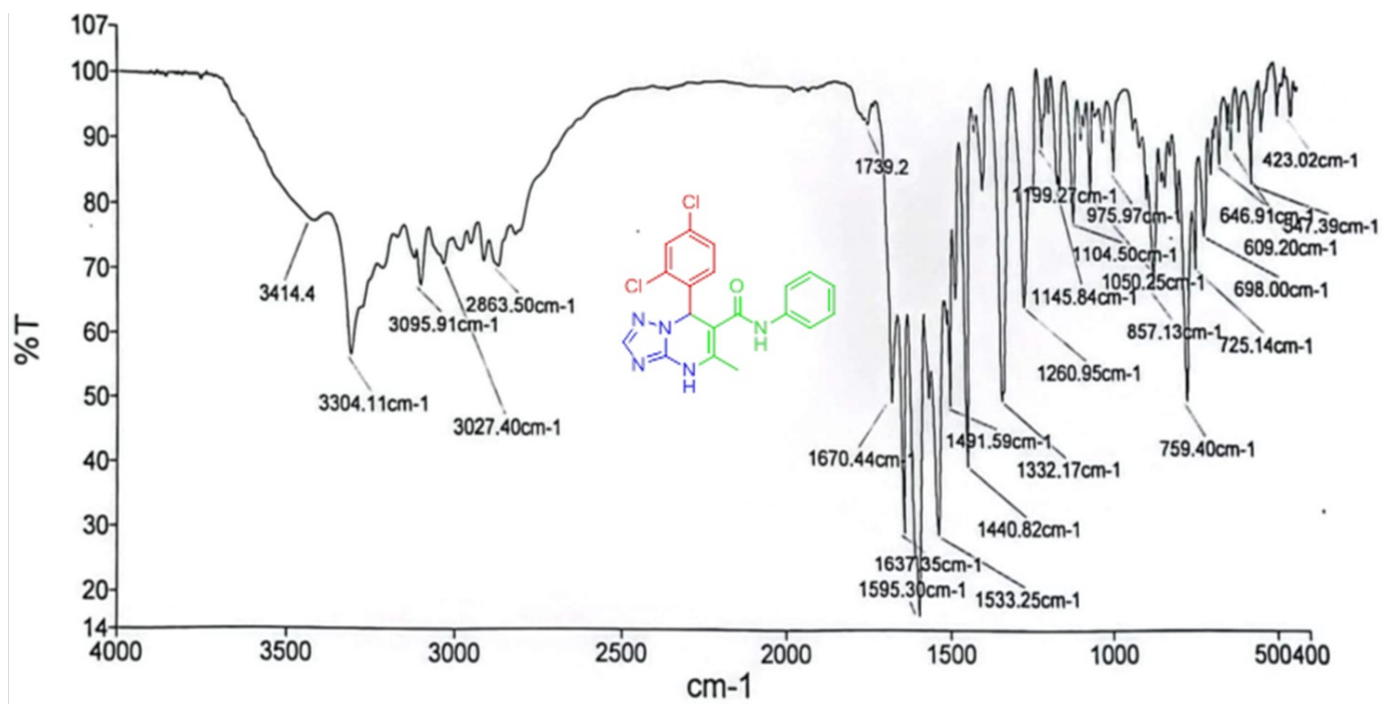

**BRÜKER**

Current Data Parameters  
NAME Hamedan-6  
EXPNO 679  
PROCNO 1

F2 - Acquisition Parameters  
Date\_ 20210419  
Time 8.57  
INSTRUM spect  
PROBHD 5 mm Multinucl  
PULPROG zg  
TD 16384  
SOLVENT DMSO  
NS 10  
DS 0  
SWH 6265.664 Hz  
FIDRES 0.382426 Hz  
AQ 1.3074932 sec  
RG 32  
DW 79.800 usec  
DE 6.00 usec  
TE 300.0 K  
D1 2.00000000 sec

----- CHANNEL f1 -----  
NUC1 1H  
P1 9.00 usec  
PL1 3.00 dB  
SFO1 250.1320010 MHz

F2 - Processing parameters  
SI 32768  
SF 250.1300000 MHz  
WDW EM  
SSB 0  
LB 1.50 Hz  
GB 0  
PC 1.00

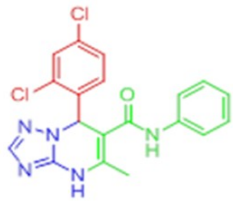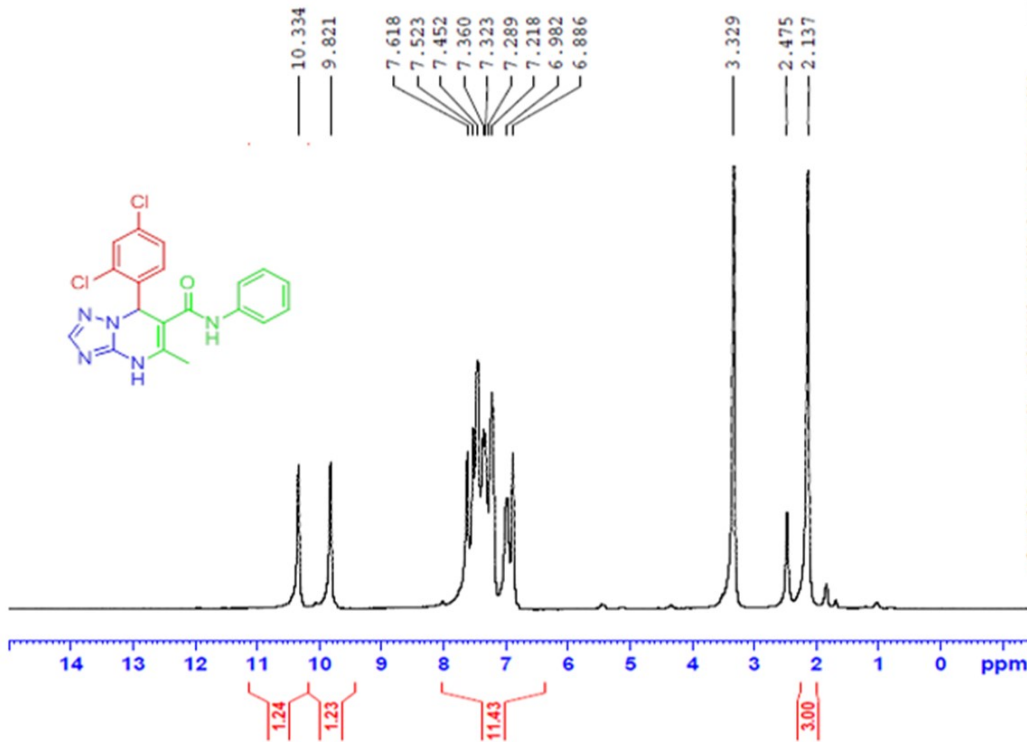

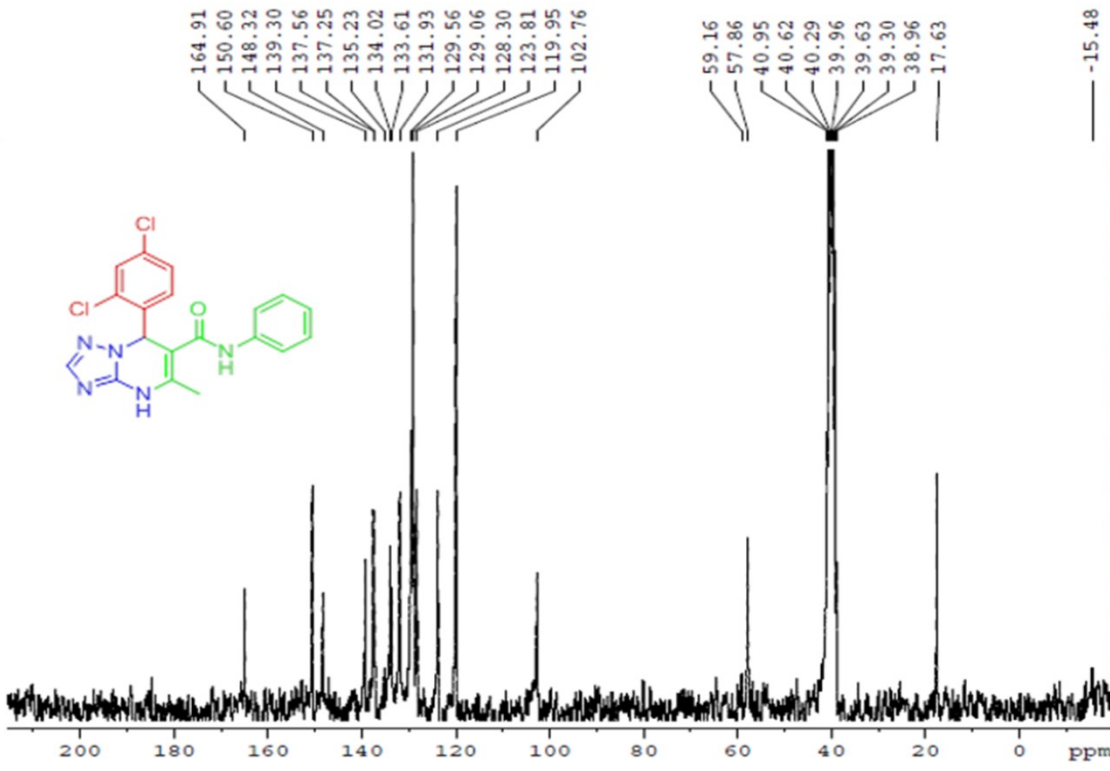

-15.48

**BRUKER**

Current Data Parameters  
 NAME Hamedan-6  
 EXPNO 680  
 PROCNO 1

F2 - Acquisition Parameters  
 Date\_ 20210419  
 Time\_ 9.15  
 INSTRUM spect  
 PROBHD 5 mm Multinucl  
 PULPROG zgpg  
 TD 65536  
 SOLVENT DMSO  
 NS 279  
 DS 0  
 SWH 15060.241 Hz  
 FIDRES 0.229801 Hz  
 AQ 2.1758451 sec  
 RG 1625.5  
 DW 33.200 usec  
 DE 6.00 usec  
 TE 300.0 K  
 D1 2.00000000 sec  
 d11 0.03000000 sec  
 d12 0.00002000 sec

----- CHANNEL f1 -----  
 NUC1 13C  
 P1 10.00 usec  
 PL1 0.00 dB  
 SFO1 62.9015280 MHz

----- CHANNEL f2 -----  
 CPDPRG2 waltz16  
 NUC2 1H  
 PCPD2 80.00 usec  
 PL2 3.00 dB  
 PL12 21.50 dB  
 PL13 23.00 dB  
 SFO2 250.1310005 MHz

F2 - Processing parameters  
 SI 32768  
 SF 62.8952390 MHz  
 WDW EM  
 SSB 0  
 LB 8.00 Hz  
 GB 0  
 PC 1.40

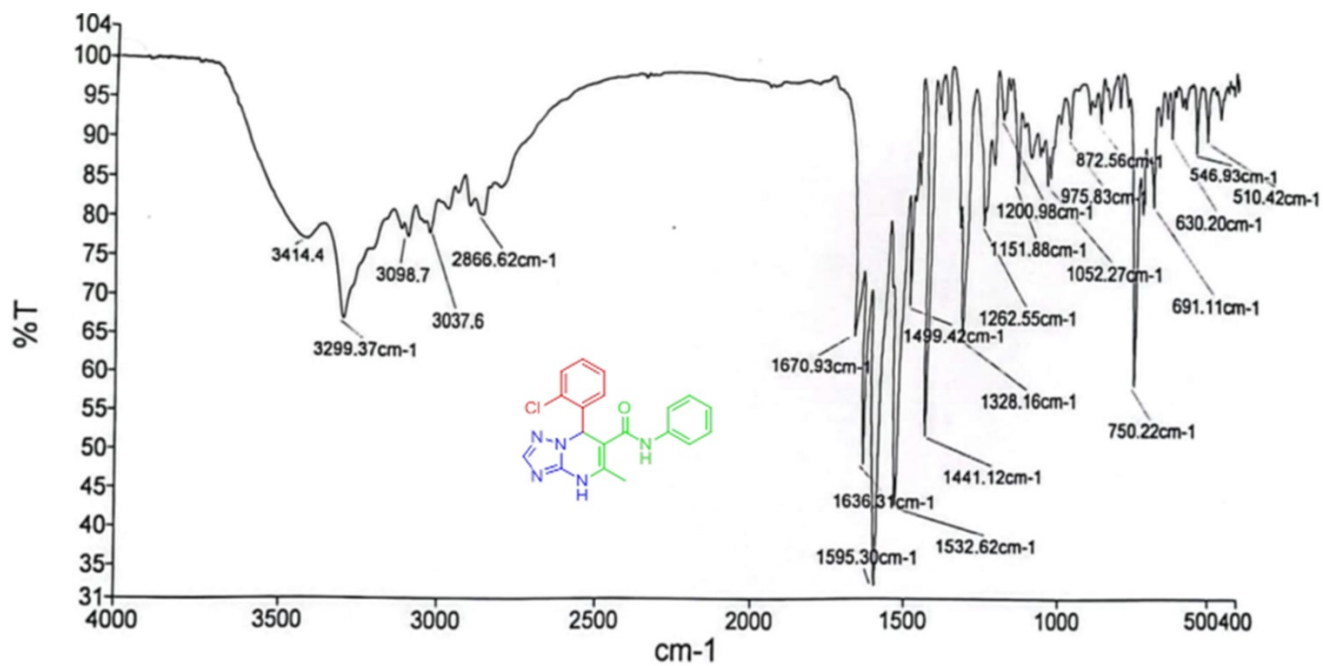

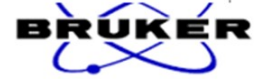

Current Data Parameters  
NAME Hamedan-6  
EXPNO 672  
PROCNO 1

F2 - Acquisition Parameters  
Date\_ 20210418  
Time\_ 15.23  
INSTRUM spect  
PROBHD 5 mm Multinucl  
PULPROG zg  
TD 16384  
SOLVENT DMSO  
NS 10  
DS 0  
SWH 6265.664 Hz  
FIDRES 0.382426 Hz  
AQ 1.3074932 sec  
RG 32  
DW 79.800 usec  
DE 6.00 usec  
TE 300.0 K  
D1 2.00000000 sec

----- CHANNEL f1 -----  
NUC1 1H  
P1 9.00 usec  
PL1 3.00 dB  
SFO1 250.1320010 MHz

F2 - Processing parameters  
SI 32768  
SF 250.1300000 MHz  
WDW EM  
SSB 0  
LB 1.50 Hz  
GB 0  
PC 1.00

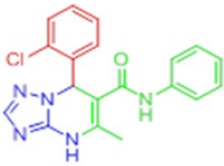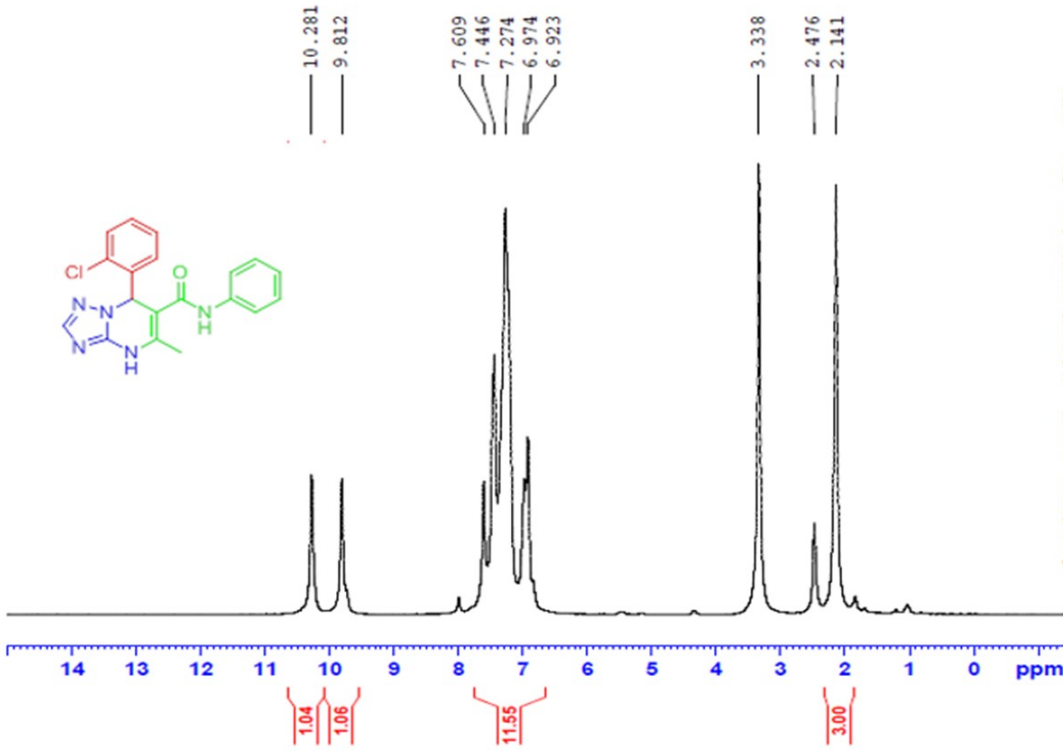



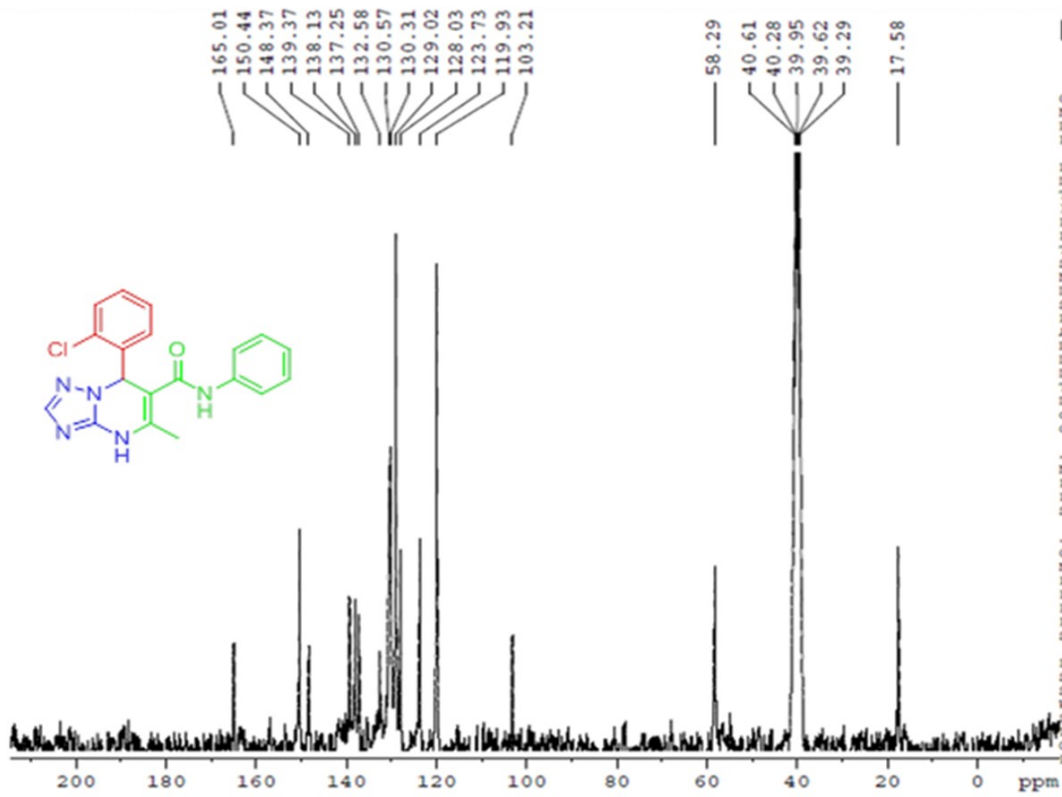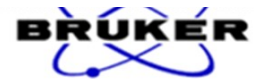

Current Data Parameters  
 NAME Hamedan-6  
 EXPNO 673  
 PROCNO 1

F2 - Acquisition Parameters  
 Date\_ 20210418  
 Time\_ 15.26  
 INSTRUM spect  
 PROBRD 5 mm Multinucl  
 PULPROG zgpg  
 TD 65536  
 SOLVENT DMSO  
 NS 331  
 DS 0  
 SWH 15060.241 Hz  
 FIDRES 0.229801 Hz  
 AQ 2.1758451 sec  
 RG 1625.5  
 DM 33.200 usec  
 DE 6.00 usec  
 TE 300.0 K  
 D1 2.00000000 sec  
 d11 0.03000000 sec  
 d12 0.00002000 sec

----- CHANNEL f1 -----  
 NUC1 13C  
 P1 10.00 usec  
 PL1 0.00 dB  
 SFO1 62.9015280 MHz

----- CHANNEL f2 -----  
 CPDPRG2 waltz16  
 NUC2 1H  
 PCPD2 80.00 usec  
 PL2 3.00 dB  
 PL12 21.50 dB  
 PL13 23.00 dB  
 SFO2 250.1310005 MHz

F2 - Processing parameters  
 SI 32768  
 SF 62.8952390 MHz  
 WDW EM  
 SSB 0  
 LB 8.00 Hz  
 GB 0  
 PC 1.40

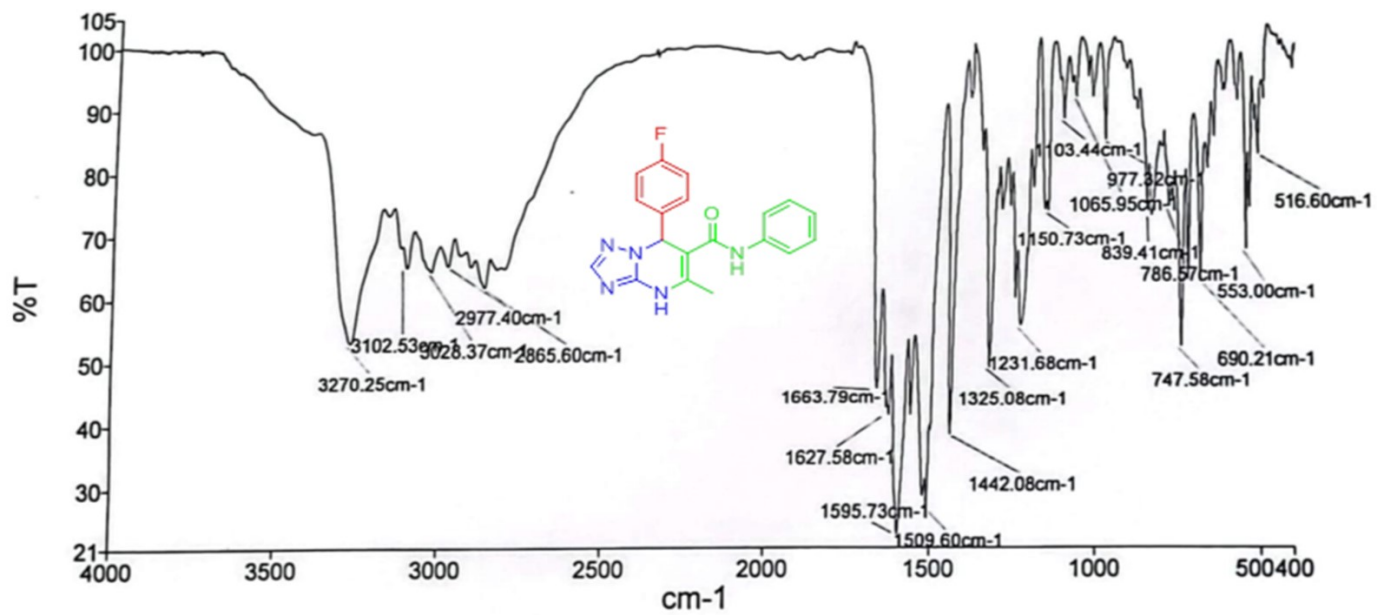

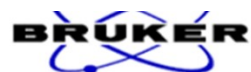

Current Data Parameters  
NAME Hamedan-6  
EXPN0 681  
PROCNO 1

F2 - Acquisition Parameters  
Date\_ 20210419  
Time 9.46  
INSTRUM spect  
PROBHD 5 mm Multinucl  
PULPROG zg  
TD 16384  
SOLVENT DMSO  
NS 10  
DS 0  
SWH 6265.664 Hz  
FIDRES 0.382426 Hz  
AQ 1.3074922 sec  
RG 32  
DW 79.800 usec  
DE 6.00 usec  
TE 300.0 K  
D1 2.00000000 sec

----- CHANNEL f1 -----  
NUC1 1H  
P1 9.00 usec  
PL1 3.00 dB  
SFO1 250.1320010 MHz  
F2 - Processing parameters  
SI 32768  
SF 250.1300000 MHz  
WDW RM  
SSB 0  
LB 1.50 Hz  
GB 0  
PC 1.00

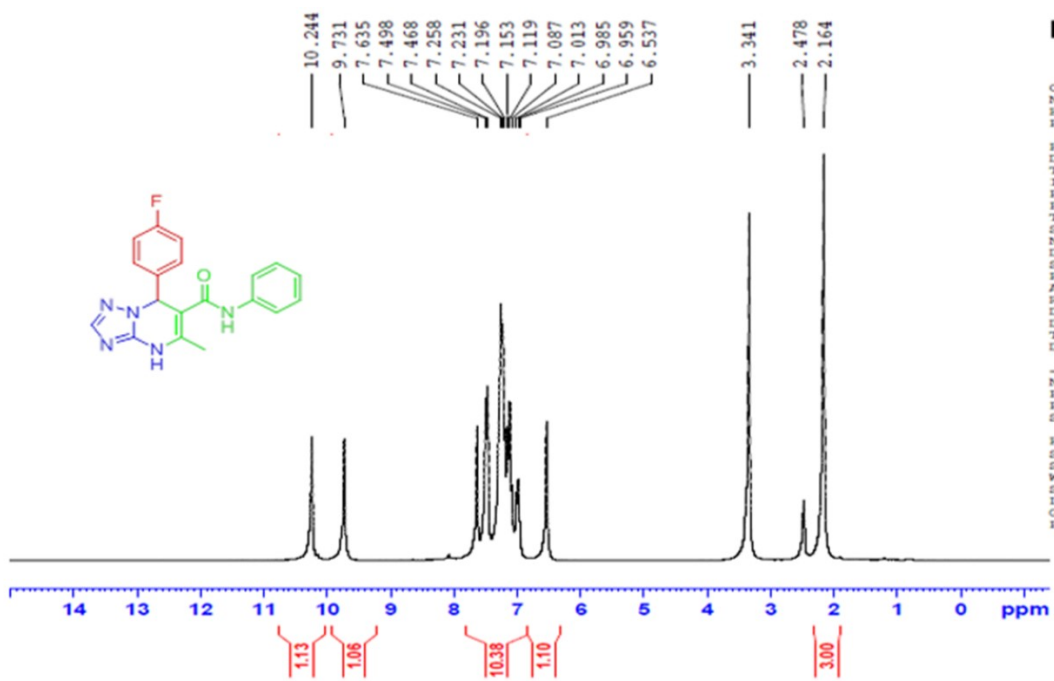

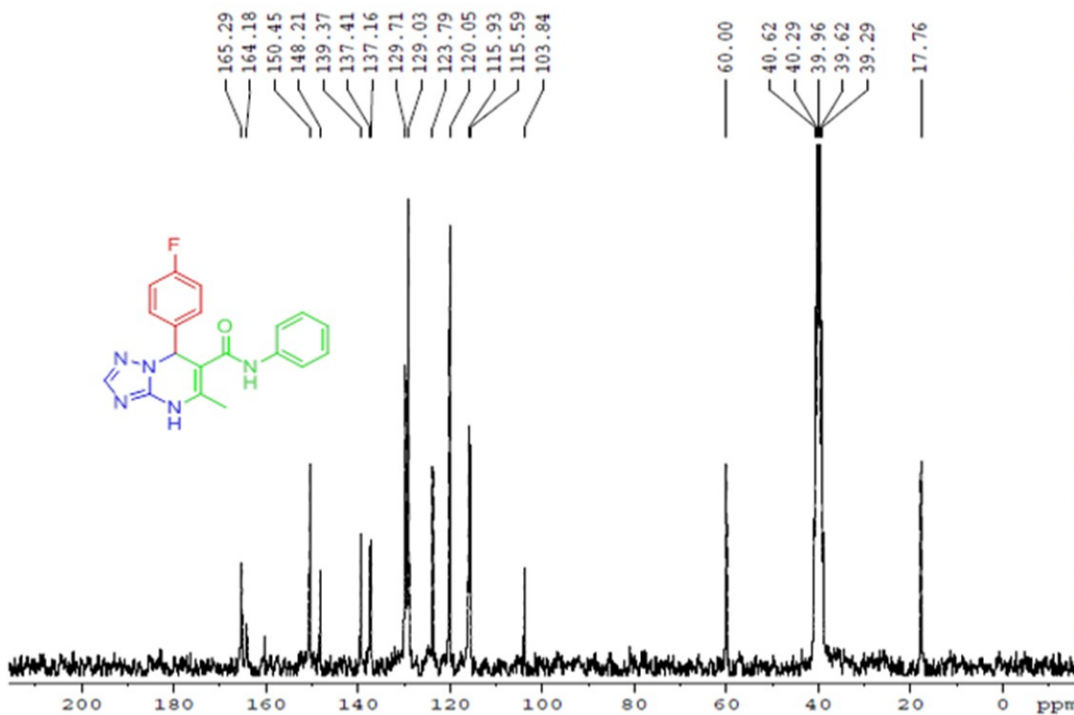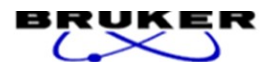

Current Data Parameters  
NAME Hamedan-6  
EXPNO 682  
PROCNO 1

F2 - Acquisition Parameters  
Date\_ 20210419  
Time 10.08  
INSTRUM spect  
PROBHD 5 mm Multinucl  
PULPROG zgpg3  
TD 65536  
SOLVENT DMSO  
NS 443  
DS 0  
SWH 15060.241 Hz  
FIDRES 0.229801 Hz  
AQ 2.1758451 sec  
RG 1625.5  
DW 33.200 usec  
DE 6.00 usec  
TE 300.0 K  
D1 2.00000000 sec  
d11 0.03000000 sec  
d12 0.00002000 sec

----- CHANNEL f1 -----  
NUC1 13C  
P1 10.00 usec  
PL1 0.00 dB  
SFO1 62.9015280 MHz

----- CHANNEL f2 -----  
CPDPRG2 waltz16  
NUC2 1H  
PCPD2 80.00 usec  
PL2 3.00 dB  
PL12 21.50 dB  
PL13 23.00 dB  
SFO2 250.1310005 MHz

F2 - Processing parameters  
SI 32768  
SF 62.8952390 MHz  
WDW RM  
SSB 0  
LB 8.00 Hz  
GB 0  
PC 1.40

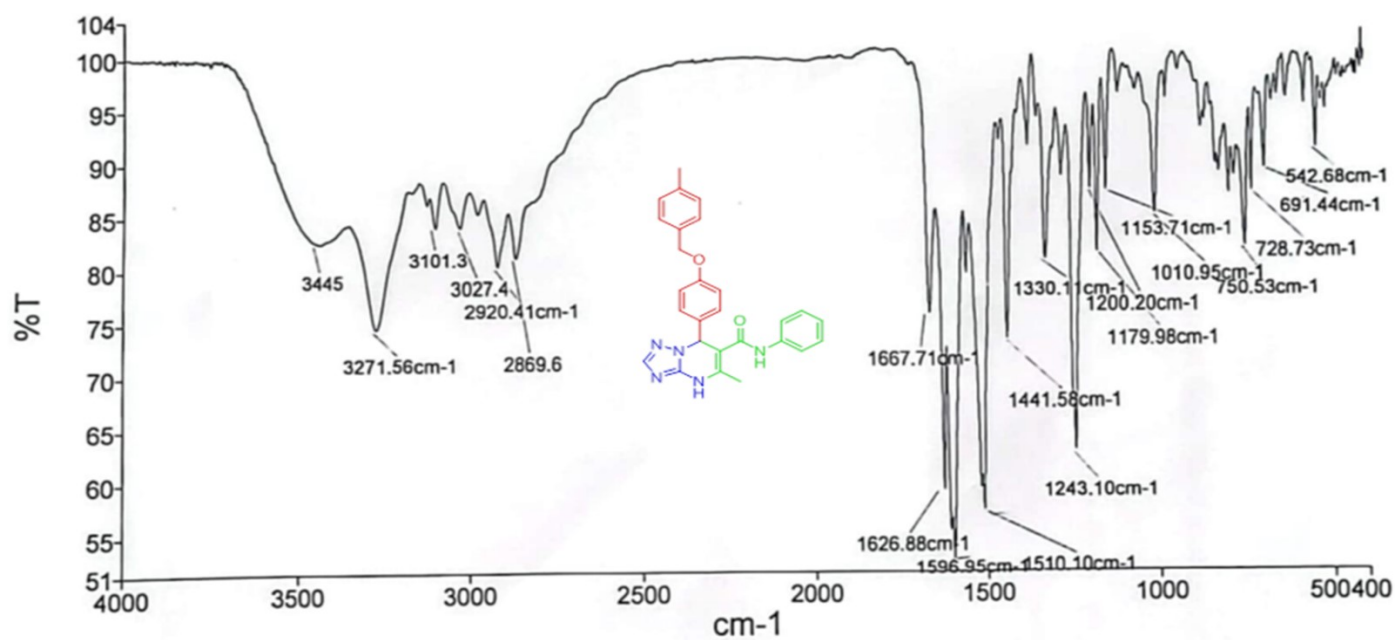

Raha-Najafi-P1

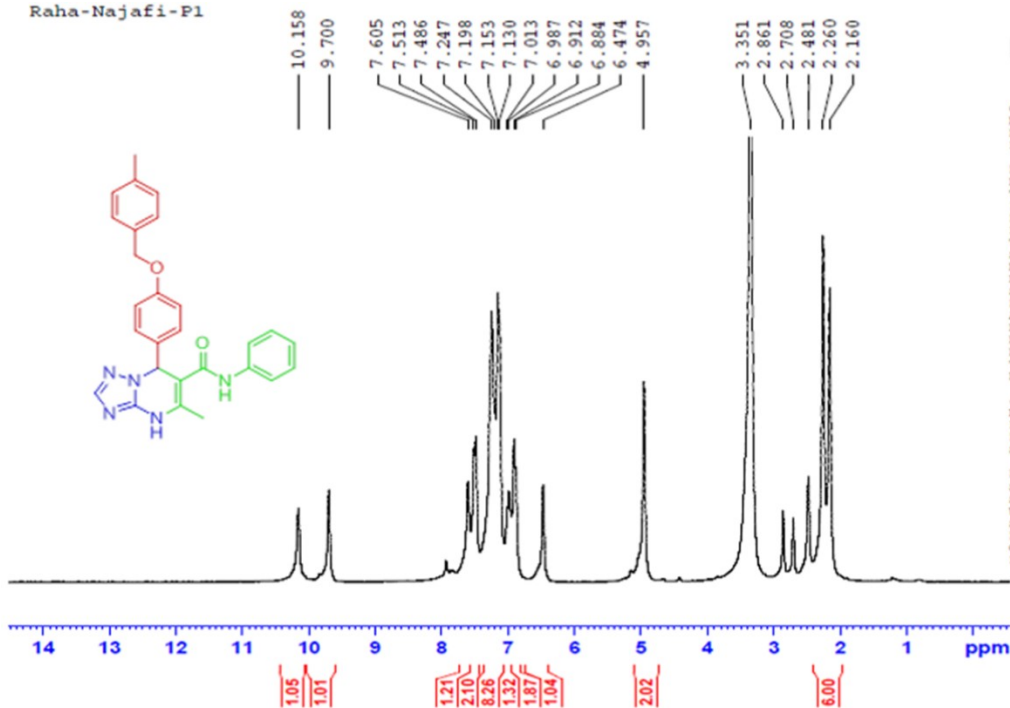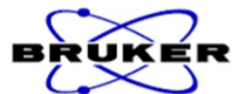

Current Data Parameters  
NAME Hamedan-6  
EXPNO 841  
PROCNO 1

F2 - Acquisition Parameters  
Date\_ 20210612  
Time 12.49  
INSTRUM spect  
PROBHD 5 mm Multinucl  
PULPROG zg  
TD 16384  
SOLVENT DMSO  
NS 16  
DS 0  
SWH 6265.664 Hz  
FIDRES 0.382426 Hz  
AQ 1.3074932 sec  
RG 32  
DW 79.800 usec  
DE 6.00 usec  
TE 300.0 K  
D1 2.00000000 sec

----- CHANNEL f1 -----  
NUC1 1H  
P1 9.00 usec  
PL1 3.00 dB  
SFO1 250.1320010 MHz

F2 - Processing parameters  
SI 32768  
SF 250.1300000 MHz  
WDW EM  
SSB 0  
LB 0.70 Hz  
GB 0  
PC 1.00

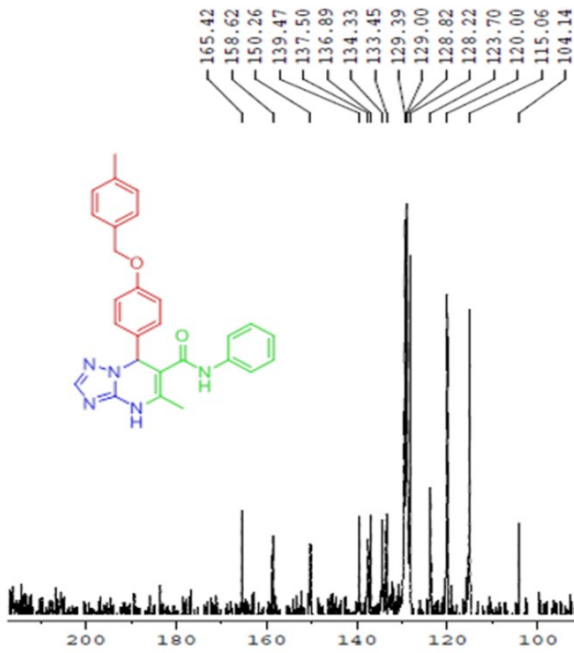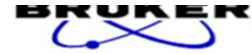

Current Data Parameters  
 NAME Hamedan-6  
 EXPNO 892  
 PROCNO 1

F2 - Acquisition Parameters  
 Date\_ 20210615  
 Time 18.54  
 INSTRUM spect  
 PROBHD 5 mm Multinucl  
 PULPROG zgpg3  
 TD 6536  
 FIDRES 0.229801 Hz  
 AQ 2.1758451 sec  
 RG 1625.5  
 DW 33.200 usec  
 DE 6.00 usec  
 TE 300.0 K  
 D1 2.00000000 sec  
 d11 0.03000000 sec  
 d12 0.00002000 sec

----- CHANNEL f1 -----  
 NUC1 13C  
 P1 10.00 usec  
 PL1 0.00 dB  
 SFO1 62.9015280 MHz

----- CHANNEL f2 -----  
 CPDPRG2 waltz16  
 NUC2 1H  
 PCPD2 80.00 usec  
 PL2 3.00 dB  
 PL12 21.50 dB  
 PL13 23.00 dB  
 SFO2 250.1310005 MHz

F2 - Processing parameters  
 SI 32768  
 SF 62.8952390 MHz  
 WDW EM  
 SSB 0  
 LB 5.00 Hz  
 GB 0  
 PC 1.40

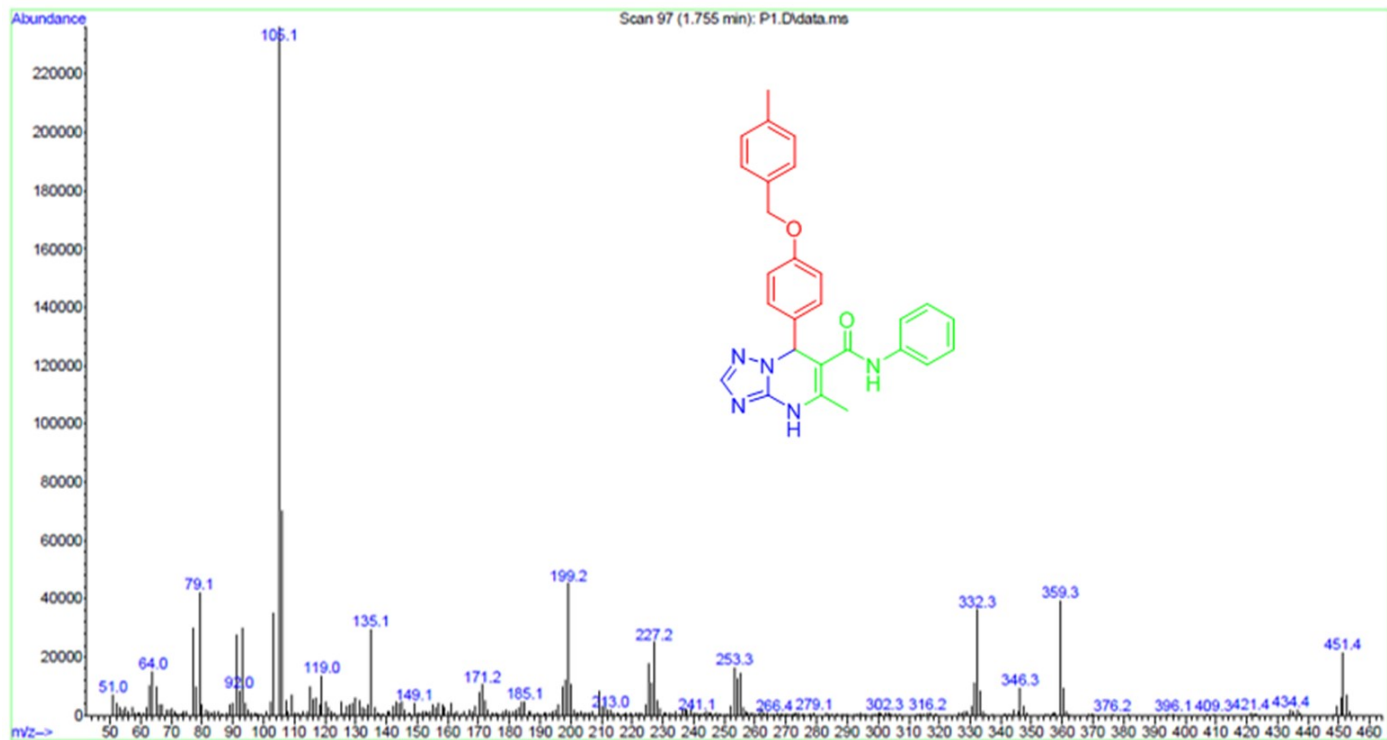



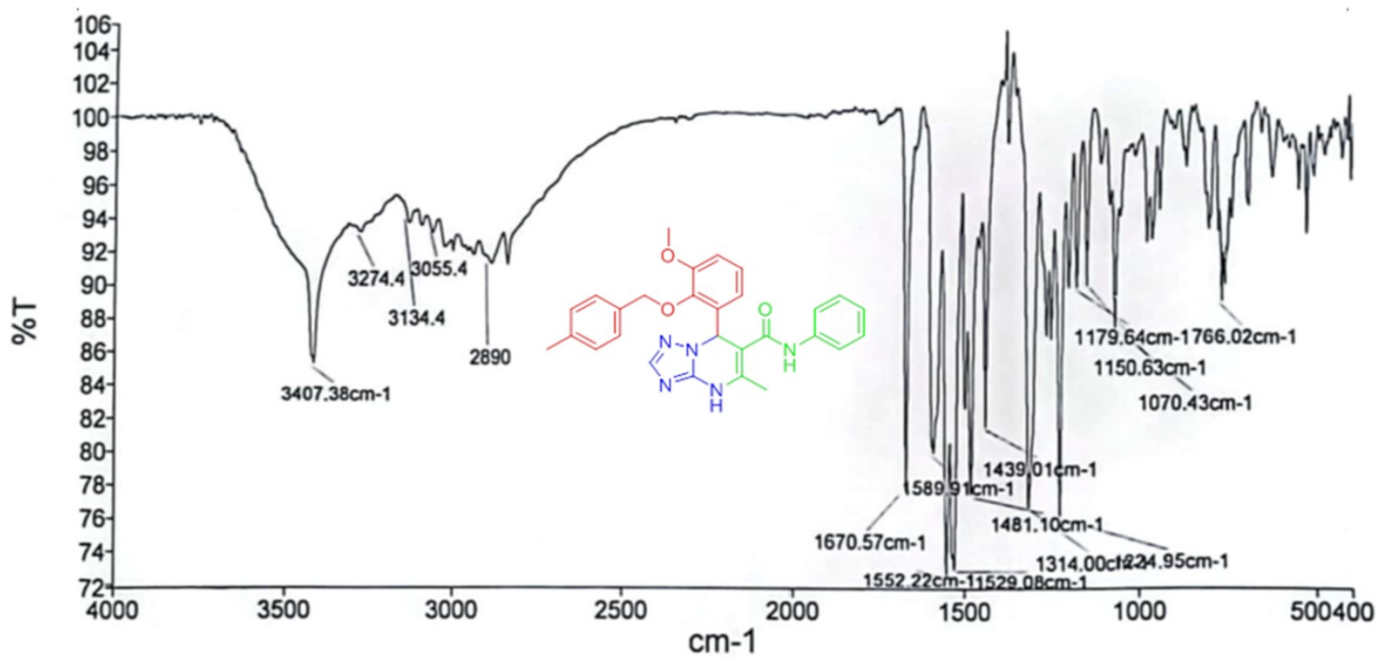

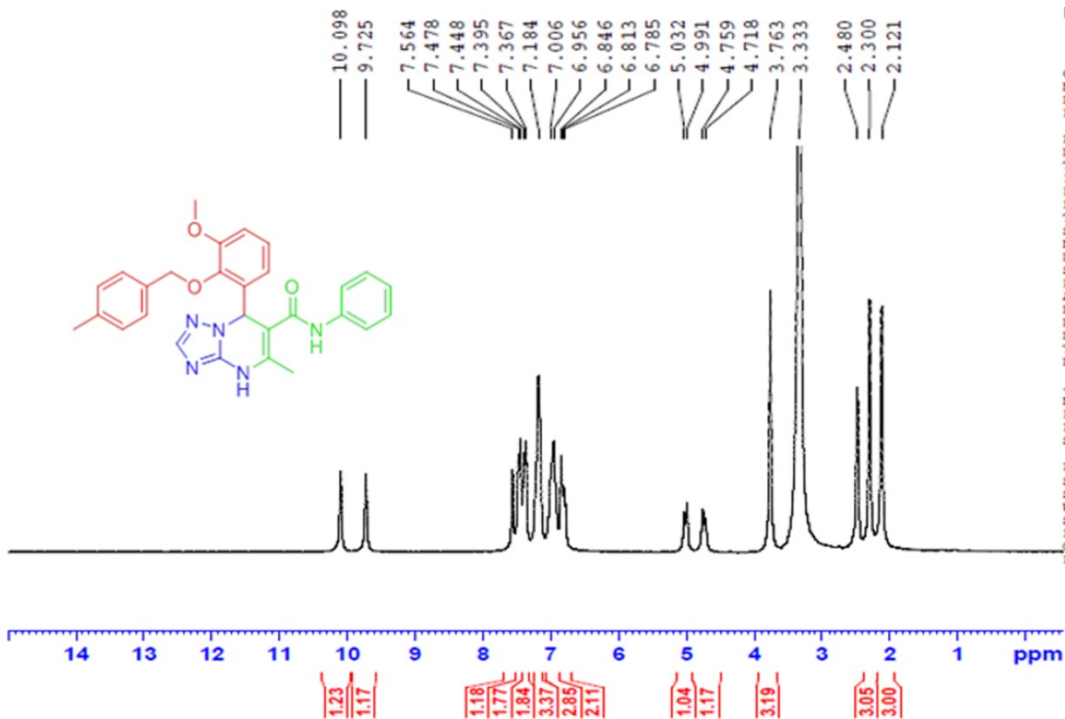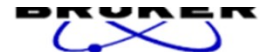

Current Data Parameters  
 NAME Hamedan-6  
 EXPNO 819  
 PROCNO 1

F2 - Acquisition Parameters  
 Date\_ 20210612  
 Time 12.40  
 INSTRUM spect  
 PROBHD 5 mm Multinucl  
 PULPROG zg  
 TD 16384  
 SOLVENT DMSO  
 NS 16  
 DS 0  
 SWH 6265.664 Hz  
 FIDRES 0.382426 Hz  
 AQ 1.3074932 sec  
 RG 32  
 DW 79.800 usec  
 DE 6.00 usec  
 TE 300.0 K  
 D1 2.00000000 sec

----- CHANNEL f1 -----  
 NUC1 1H  
 P1 9.00 usec  
 PL1 3.00 dB  
 SFO1 250.1320010 MHz

F2 - Processing parameters  
 SI 32768  
 SF 250.1300000 MHz  
 WDW RM  
 SSB 0  
 LB 0.70 Hz  
 GB 0  
 PC 1.00

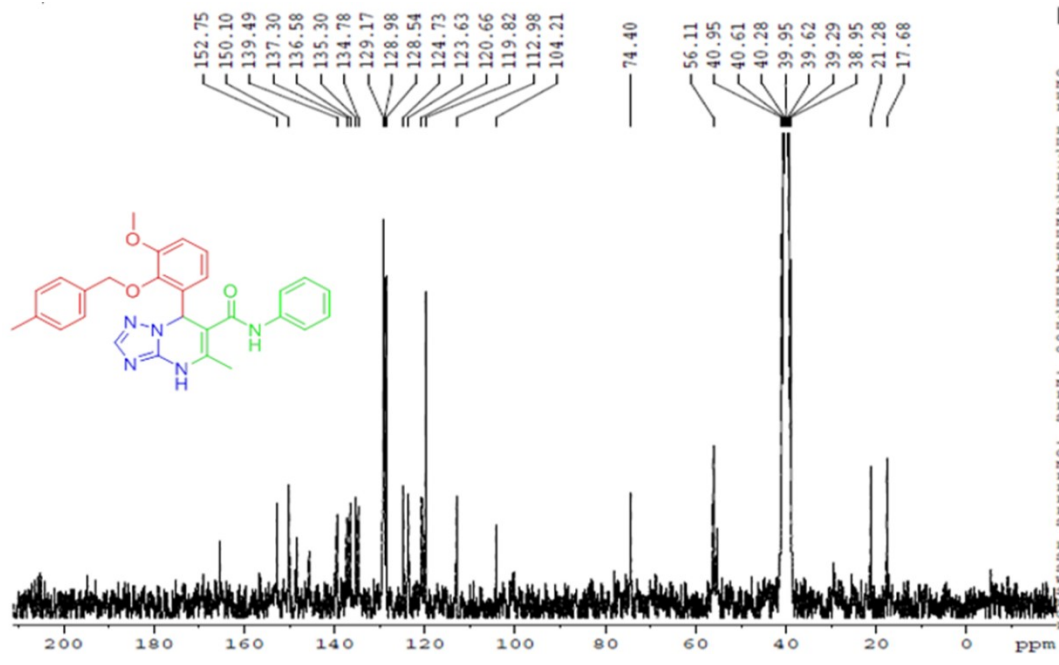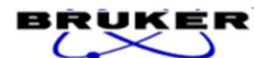

Current Data Parameters  
 NAME Hamedan-6  
 EXPNO 891  
 PROCNO 1

F2 - Acquisition Parameters  
 Date 20210615  
 Time 14.20  
 INSTRUM spect  
 PROBHD 5 mm Multinucl  
 PULPROG zgpg  
 TD 65536  
 SOLVENT DMSO  
 NS 881  
 DS 0  
 SWH 15060.241 Hz  
 FIDRES 0.229801 Hz  
 AQ 2.1758451 sec  
 RG 1625.5  
 DW 33.200 usec  
 DE 6.00 usec  
 TE 300.0 K  
 D1 2.00000000 sec  
 d11 0.03000000 sec  
 d12 0.00002000 sec

----- CHANNEL f1 -----  
 NUC1 13c  
 P1 10.00 usec  
 PL1 0.00 dB  
 SFO1 62.9015280 MHz

----- CHANNEL f2 -----  
 CPDPRG2 waltz16  
 NUC2 1H  
 PCPD2 80.00 usec  
 PL2 3.00 dB  
 PL12 21.50 dB  
 PL13 23.00 dB  
 SFO2 250.1310005 MHz

F2 - Processing parameters  
 SI 32768  
 SF 62.8952390 MHz  
 NCV 8K  
 HB 0  
 LB 5.00 Hz  
 GB 0  
 PC 1.40

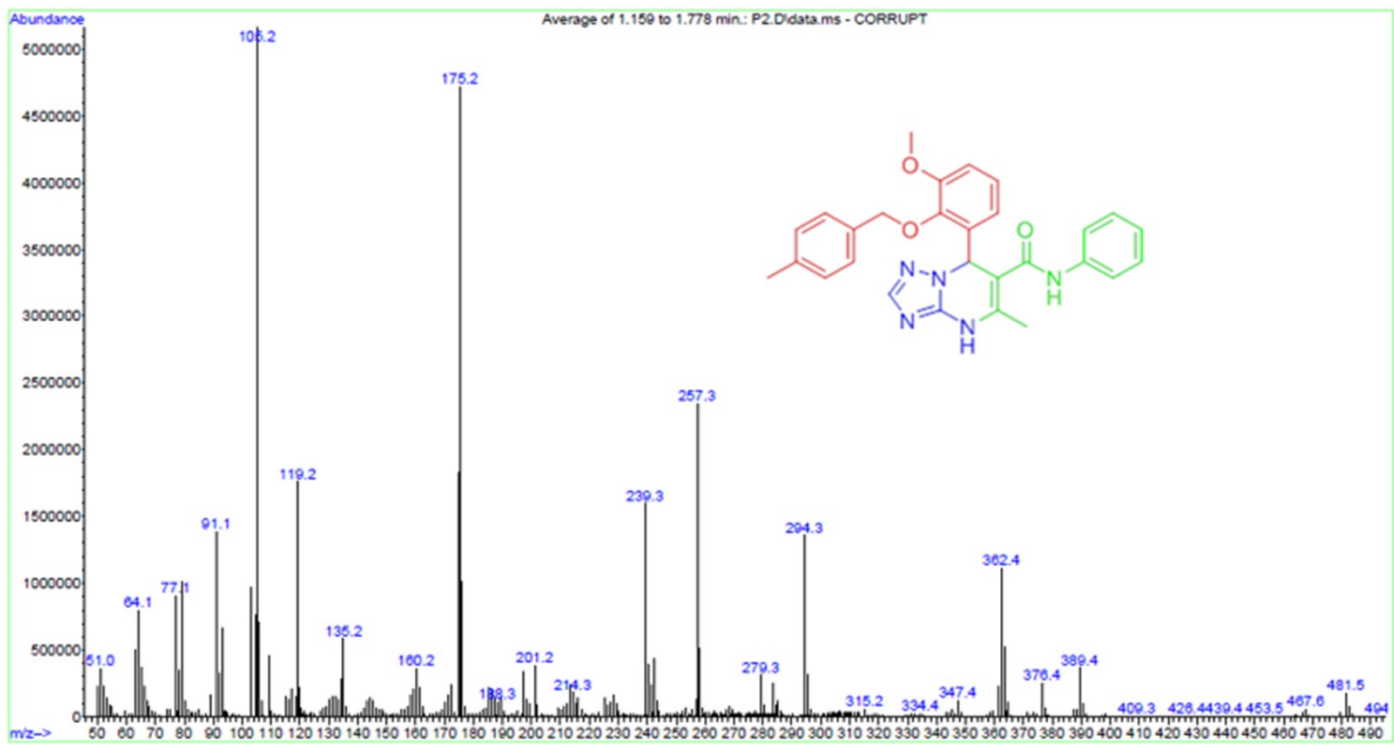

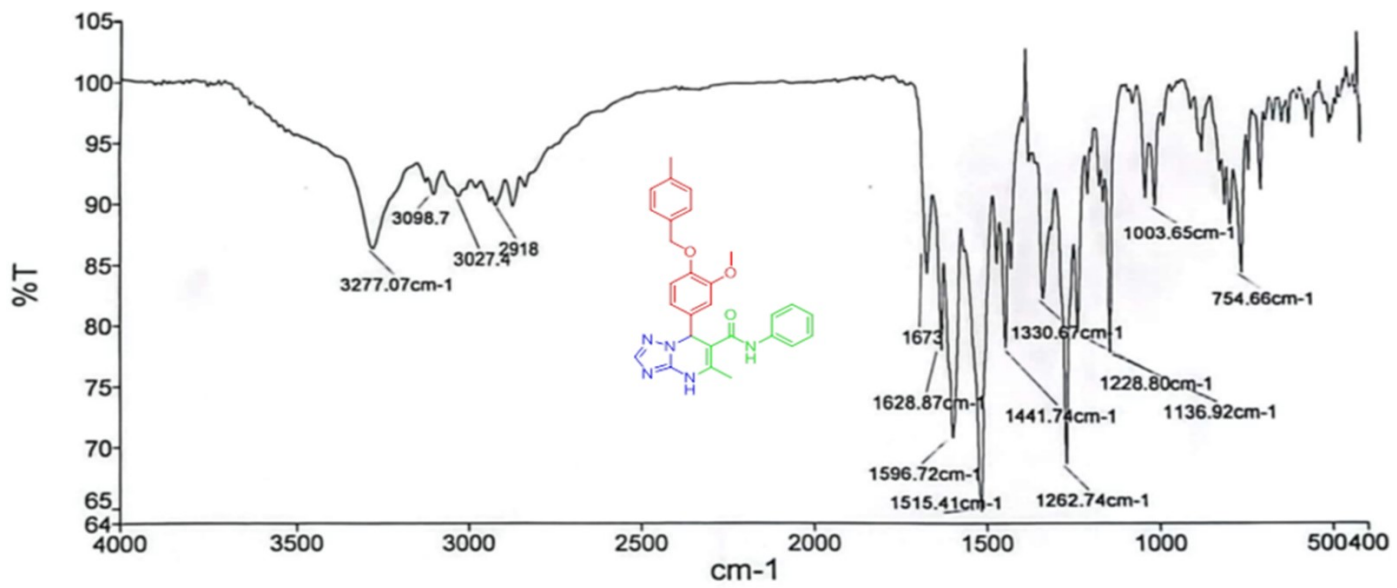

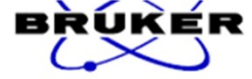

Current Data Parameters  
NAME Hamedan-6  
EXPNO 816  
PROCNO 1

F2 - Acquisition Parameters  
Date\_ 20210612  
Time 11.28  
INSTRUM spect  
PROBHD 5 mm Multinucl  
PULPROG zg  
TD 16384  
SOLVENT DMSO  
NS 16  
DS 0  
SWH 6265.664 Hz  
FIDRES 0.382426 Hz  
AQ 1.1074932 sec  
RG 32  
DW 79.800 usec  
DE 6.00 usec  
TE 300.0 K  
D1 2.00000000 sec

----- CHANNEL f1 -----  
NUC1 1H  
P1 9.00 usec  
PL1 3.00 dB  
SFO1 250.1320010 MHz

F2 - Processing parameters  
SI 32768  
SF 250.1300000 MHz  
WDW EM  
SSB 0  
LB 0.70 Hz  
GB 0  
PC 1.00

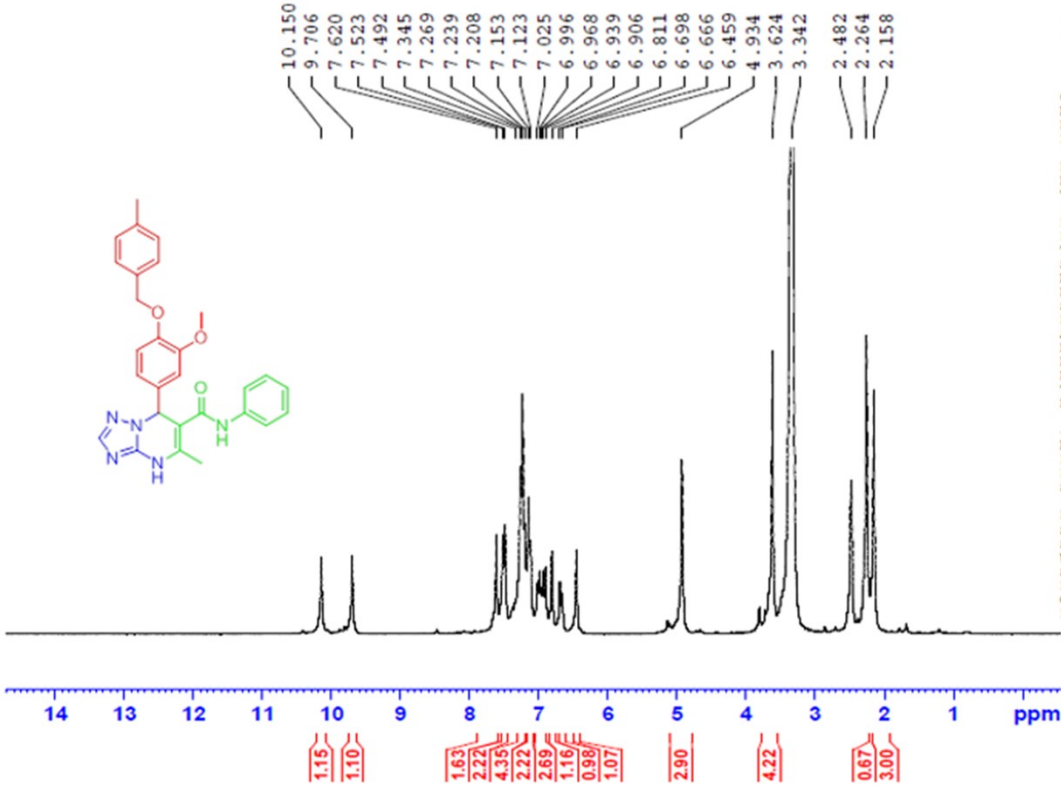

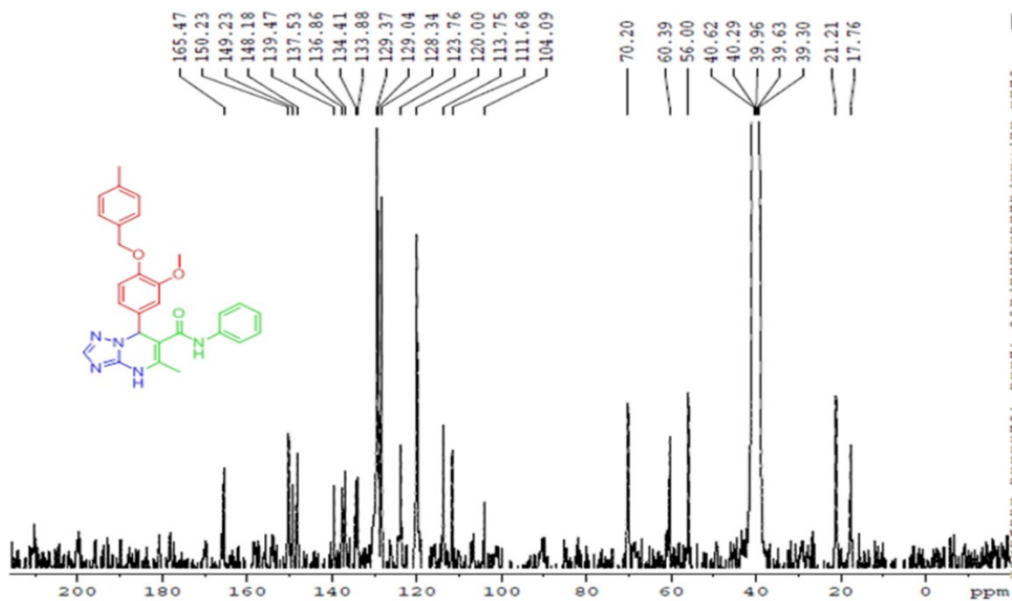

**BRUKER**

```

Current Data Parameters
NAME      Hamdan-6
EXPNO    837
PROCNO   1

F2 - Acquisition Parameters
Date_    20210612
Time     11.34
INSTRUM  spect
PROBHD   5 mm MultiNuc1
PULPROG  zgpg
TD        65536
SOLVENT  DMSO
NS        726
DS        0
SWH       15060.241 Hz
FIDRES    0.229801 Hz
AQ        2.1758451 sec
RG        3625.5
DW        33.200 usec
DE        6.00 usec
TE        300.0 K
D1        2.00000000 sec
d11       0.03000000 sec
d12       0.00002000 sec

----- CHANNEL f1 -----
NUC1      13C
P1        10.00 usec
PL1       0.00 dB
SFO1      62.9015280 MHz

----- CHANNEL f2 -----
CPDPRG2  waltz16
NUC2      1H
PCPD2     80.00 usec
PL2       3.00 dB
PL12      21.50 dB
PL13      23.00 dB
SFO2      250.1310005 MHz

F2 - Processing parameters
SI        32768
SF        62.8952390 MHz
WDW       RM
SSB       0
GB        0
PC        1.40
  
```

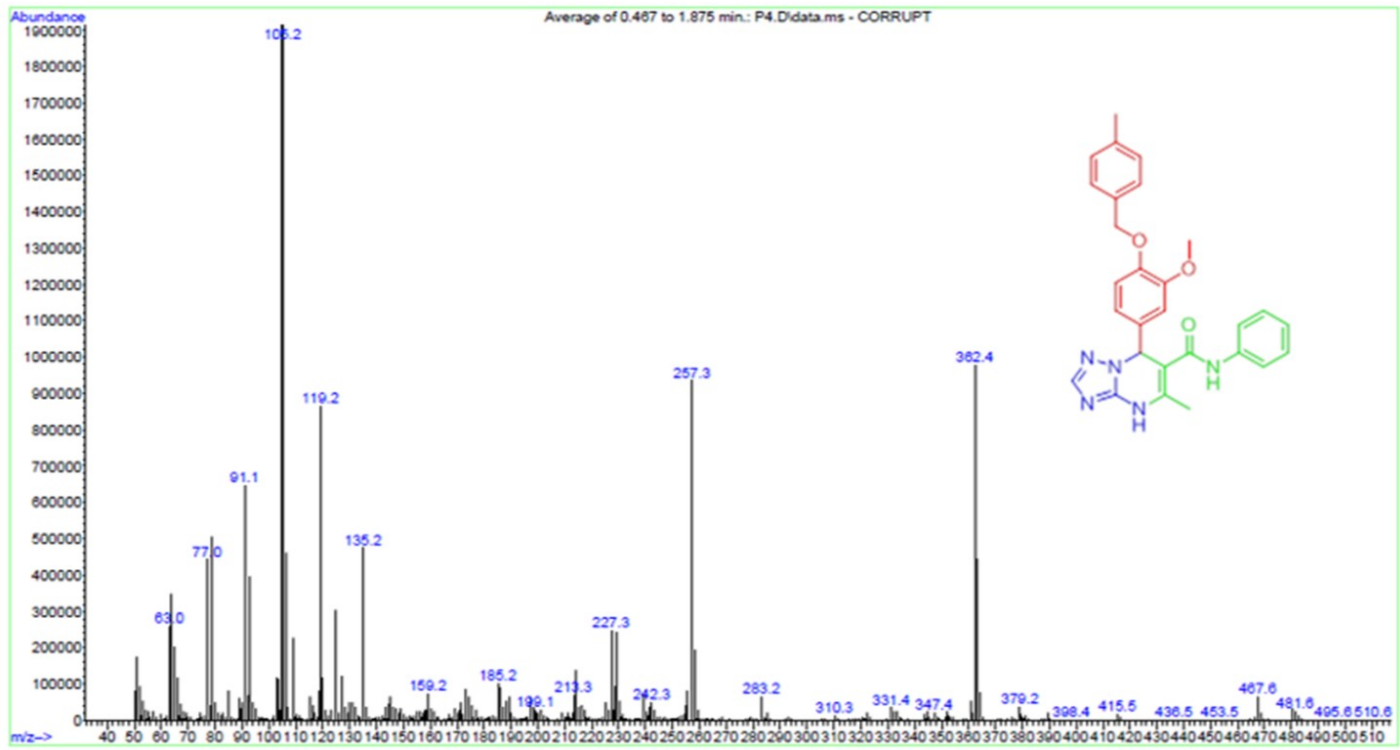



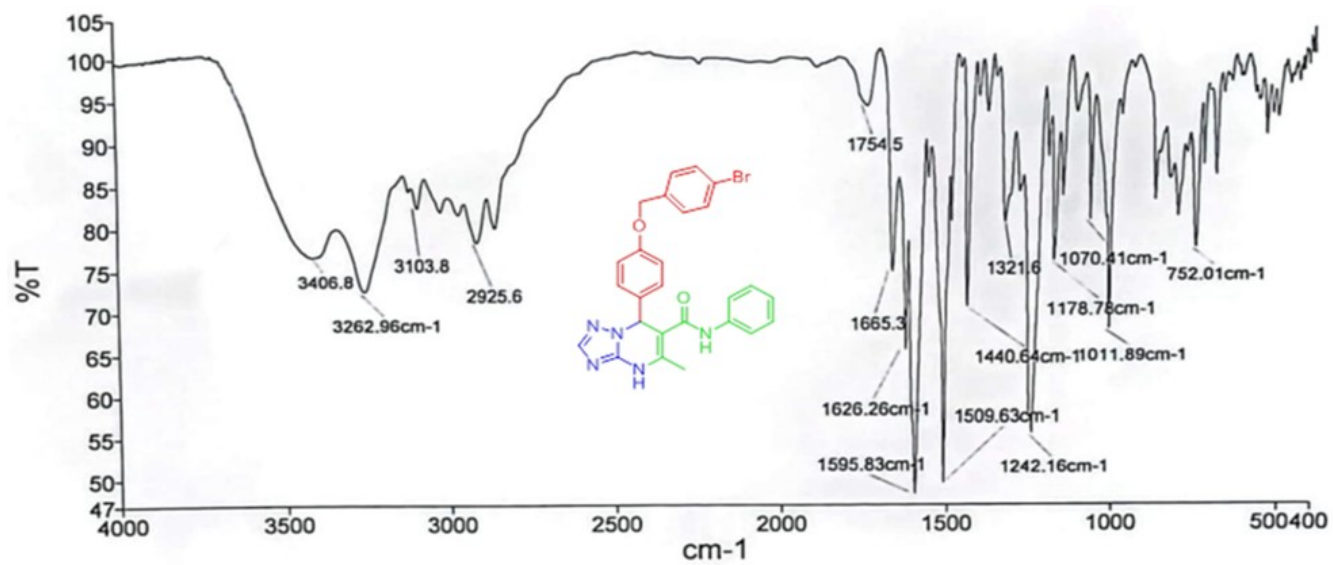

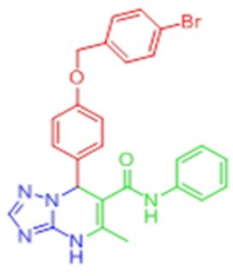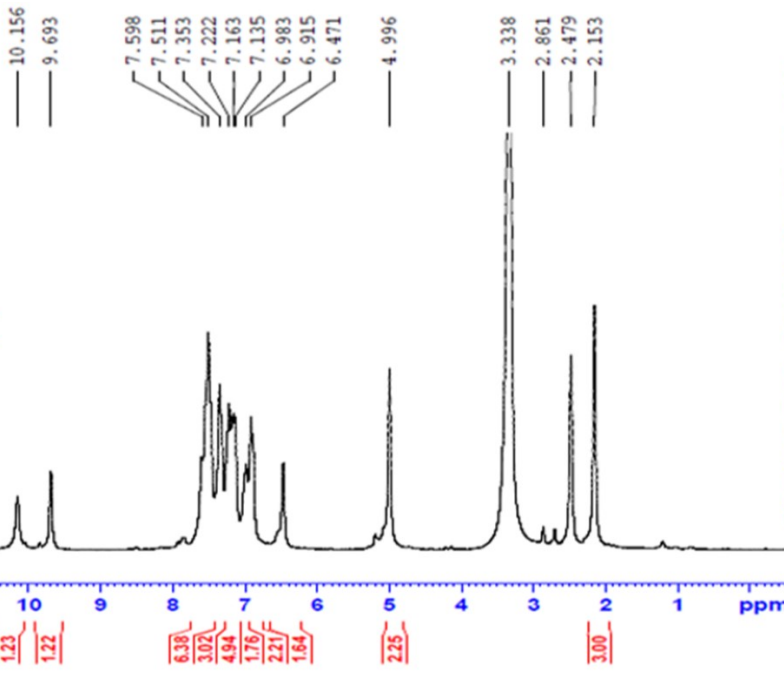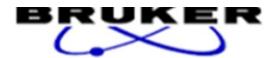

```

Current Data Parameters
NAME      Hamedan-6
EXPNO    838
PROCNO   1

F2 - Acquisition Parameters
Date_    20210612
Time     12.35
INSTRUM  spect
PROBHD   5 mm Multinucl
PULPROG  zg
TD        16384
SOLVENT  DMSO
NS        16
DS        0
SWH       6265.664 Hz
FIDRES    0.382426 Hz
AQ        1.3074932 sec
RG        32
DW        79.800 usec
DE        6.00 usec
TE        300.0 K
D1        2.00000000 sec

----- CHANNEL f1 -----
NUC1      1H
P1        9.00 usec
PL1       3.00 dB
SFO1      250.1320010 MHz

F2 - Processing parameters
SI        32768
SF        250.1300000 MHz
WDW       RM
SSB       0
LB        0.70 Hz
GB        0
PC        1.00
  
```

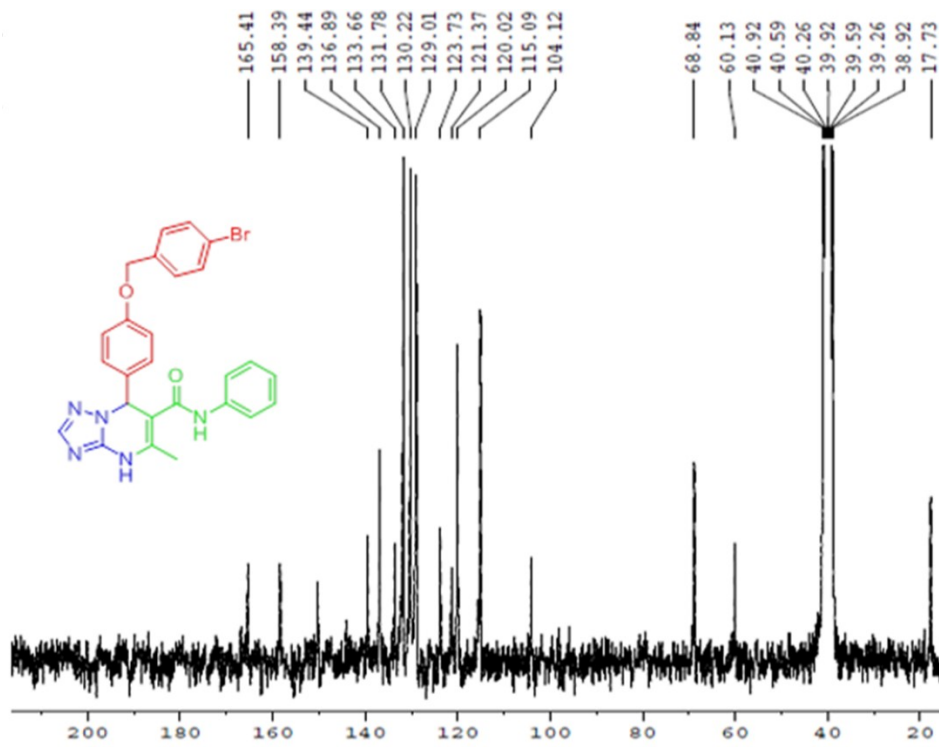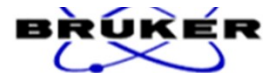

Current Data Parameters  
 NAME Hamedan-6  
 EXPTNO 889  
 PROCNO 1

F2 - Acquisition Parameters  
 Date\_ 20210625  
 Time\_ 19.01  
 INSTRUM spect  
 PROBHD 5 mm Multinucl  
 PULPROG zgpg  
 TD 65536  
 SOLVENT DMSO  
 NS 1657  
 DS 0  
 SWH 15060.241 Hz  
 FIDRES 0.229801 Hz  
 AQ 2.1758451 sec  
 RG 1625.5  
 DW 33.200 usec  
 DE 6.00 usec  
 TE 300.0 K  
 D1 2.0000000 sec  
 d11 0.0300000 sec  
 d12 0.00002000 sec

----- CHANNEL f1 -----  
 NUC1 13C  
 P1 10.00 usec  
 PL1 0.00 dB  
 SFO1 62.9015280 MHz

----- CHANNEL f2 -----  
 CPDPRG2 waltz16  
 NUC2 1H  
 PCPD2 80.00 usec  
 PL2 3.00 dB  
 PL12 21.50 dB  
 PL13 23.00 dB  
 SFO2 250.1310005 MHz

F2 - Processing parameters  
 SI 32768  
 SF 62.8952390 MHz  
 WDW EM  
 SSB 0  
 LB 5.00 Hz  
 GB 0  
 PC 1.40

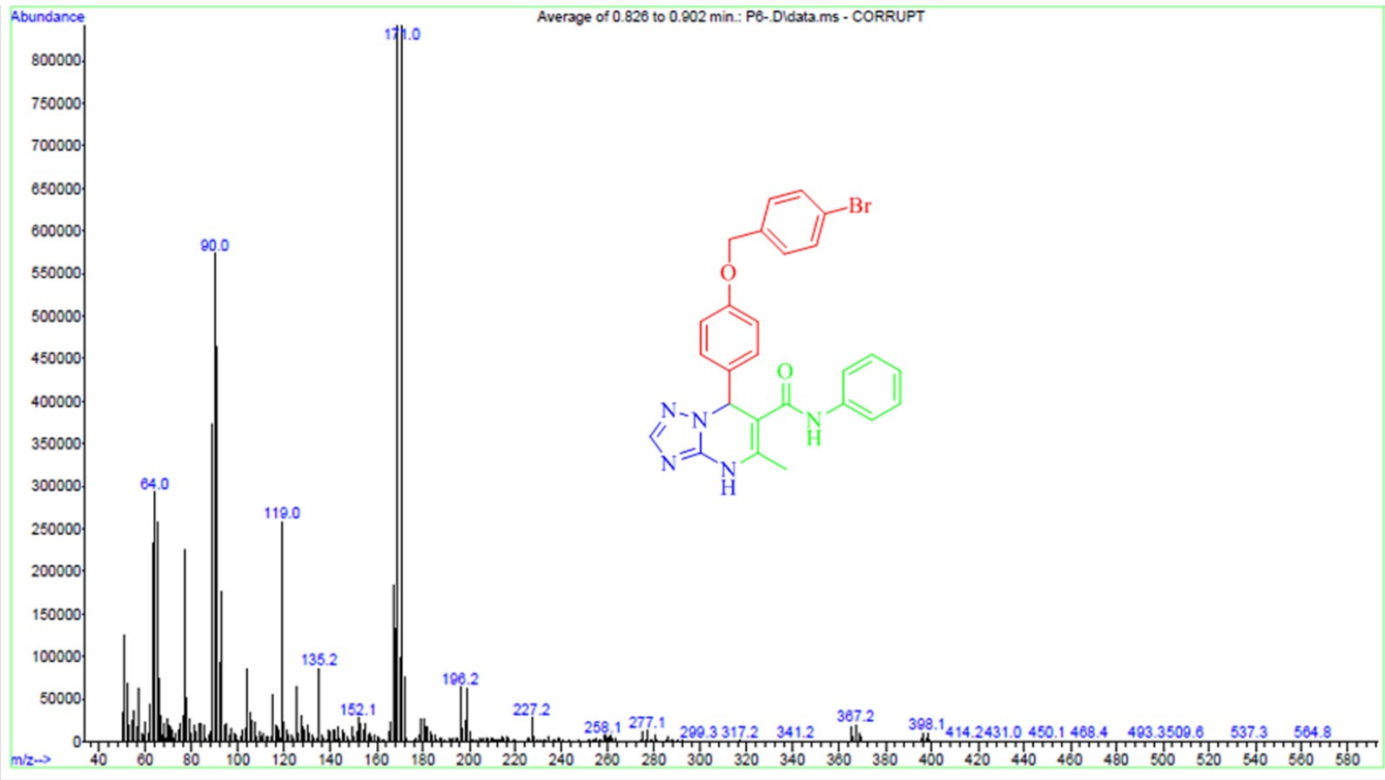

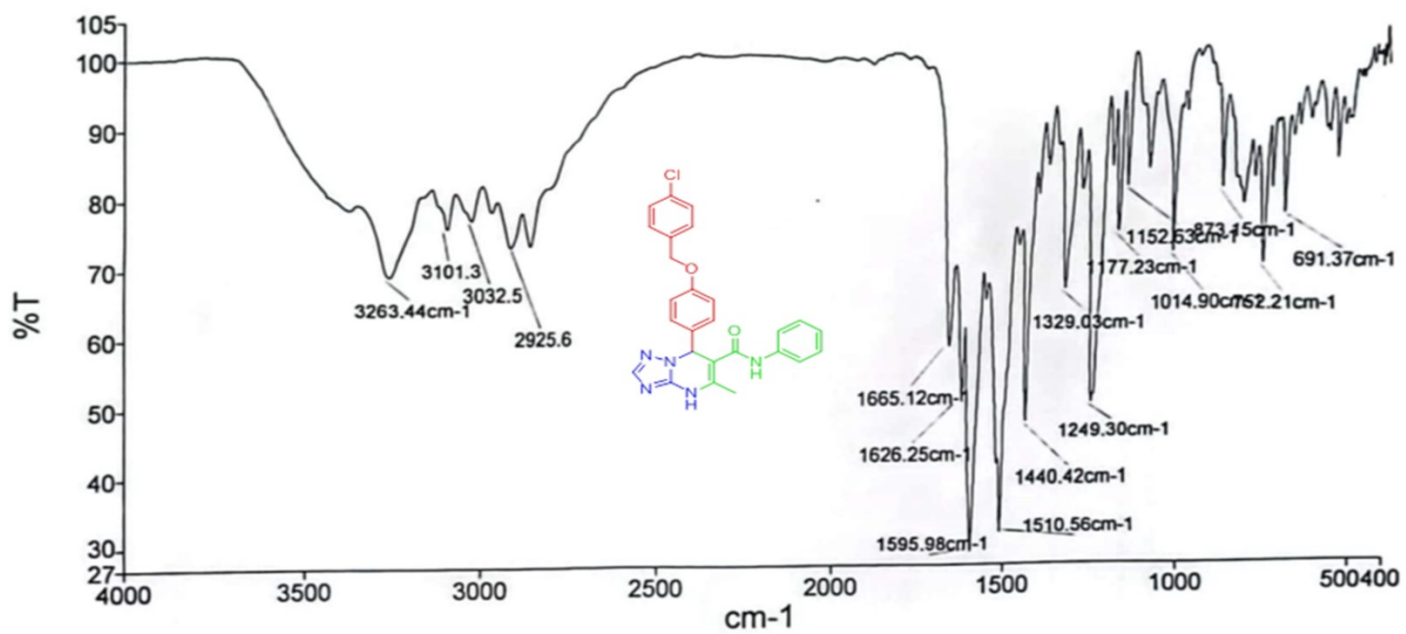

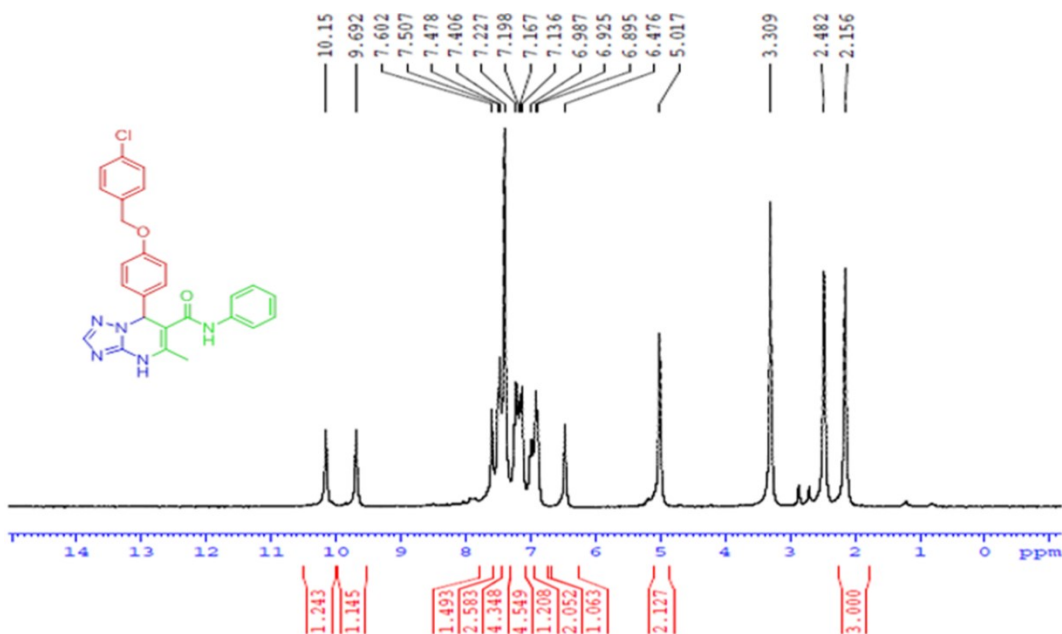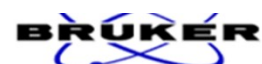

```

Current Data Parameters
NAME: Hamedan-6
EXPRO: 834
PROCNO: 1

F2 - Acquisition Parameters
Date: 20210612
Time: 9.54
INSTRUM: spect
PROBHD: 5 mm Multinucl
PULPROG: zg
TD: 16384
SOLVENT: DMSO
NS: 16
DS: 0
SWH: 6265.664 Hz
FIDRES: 0.382426 Hz
AQ: 1.3074932 sec
RG: 32
DW: 79.800 usec
DE: 6.00 usec
TE: 300.0 K
D1: 2.00000000 sec

----- CHANNEL f1 -----
NUC1: 1H
P1: 9.00 usec
PL1: 1.00 dB
SFO1: 250.1320010 MHz

F2 - Processing parameters
SI: 32768
SP: 250.1300000 MHz
WDW: RM
SSB: 0
LB: 0.70 Hz
GB: 0
PC: 1.00
  
```

Raha-Najafi-P7

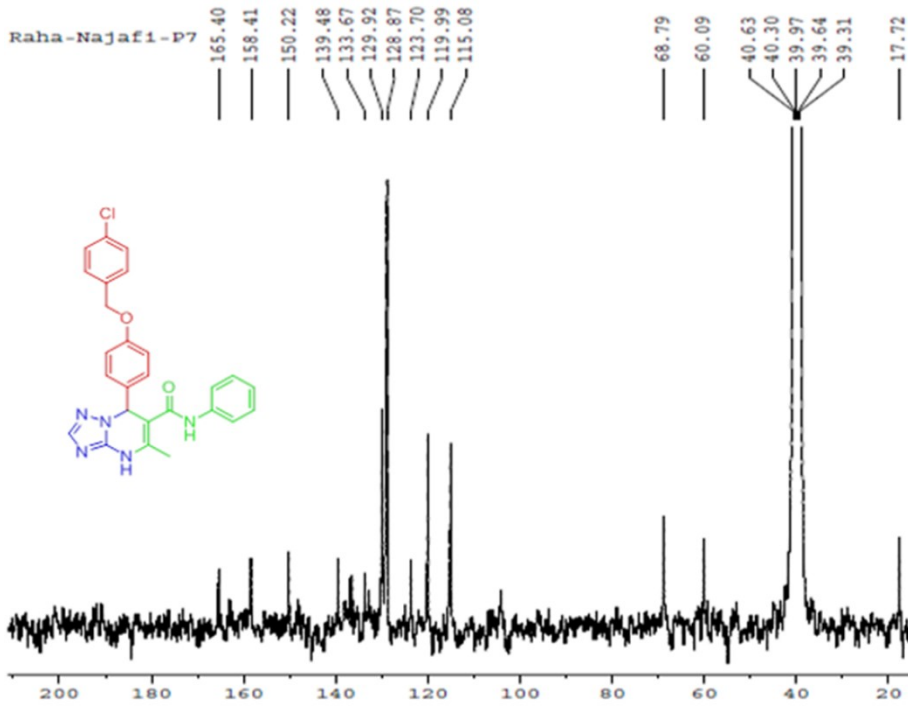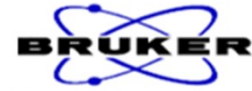

Current Data Parameters  
NAME Hamedan-6  
EXPNO 835  
PROCNO 1

F2 - Acquisition Parameters  
Date\_ 20210625  
Time 9.50  
INSTRUM spect  
PROBHD 5 mm Multinucl  
PULPROG zgpg3  
TD 65536  
SOLVENT DMSO  
NS 2860  
DS 0  
SWH 15060.241 Hz  
FIDRES 0.229801 Hz  
AQ 2.1758451 sec  
RG 3625.8  
DW 33.200 usec  
DE 6.00 usec  
TK 300.0 K  
D1 2.0000000 sec  
d11 0.0300000 sec  
d12 0.0000200 sec

----- CHANNEL F1 -----  
NUC1 13C  
P1 10.00 usec  
PL1 0.00 dB  
SFO1 62.9015280 MHz

----- CHANNEL F2 -----  
CDDPRG2 waltz16  
NUC2 1H  
PCDD2 80.00 usec  
PL2 3.00 dB  
PL12 21.50 dB  
PL13 23.00 dB  
SFO2 250.1310005 MHz

F2 - Processing parameters  
SI 32768  
SF 62.8952390 MHz  
WDW EM  
SSB 0  
LB 10.00 Hz  
GB 0  
PC 1.40

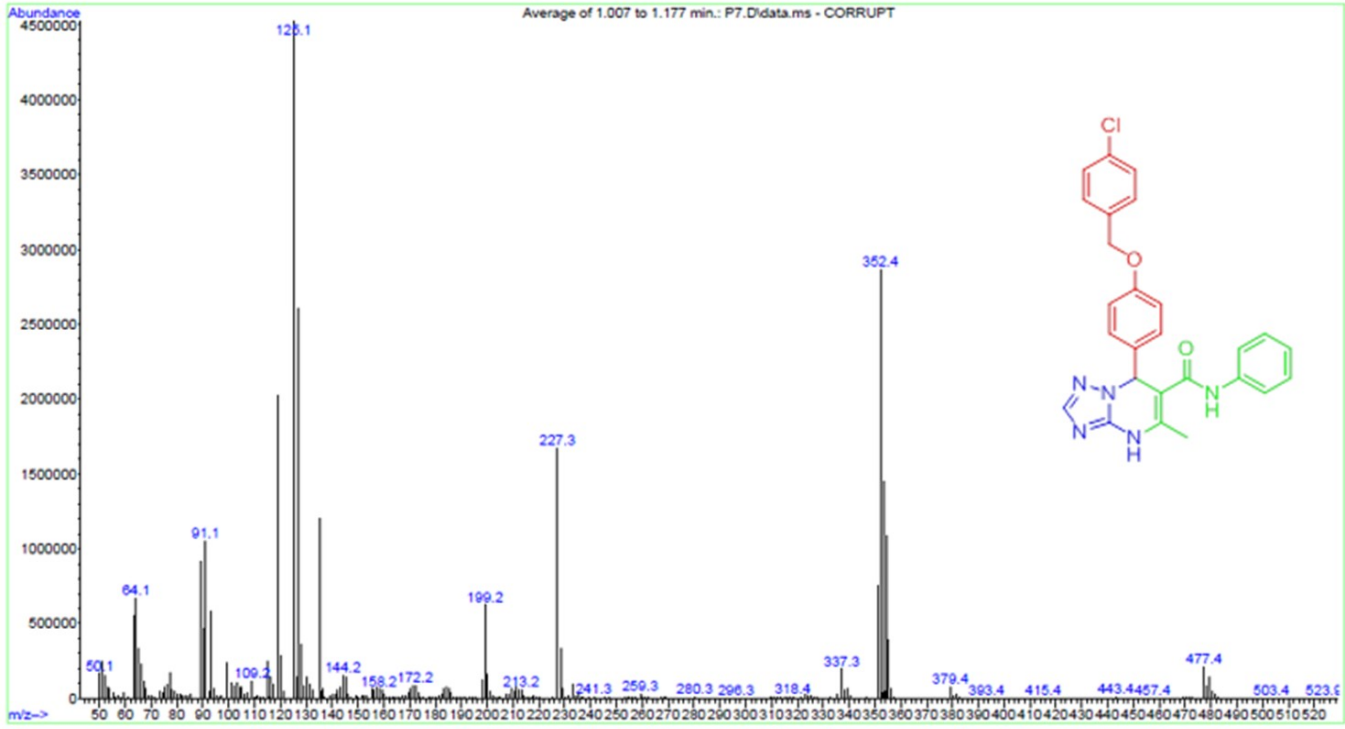



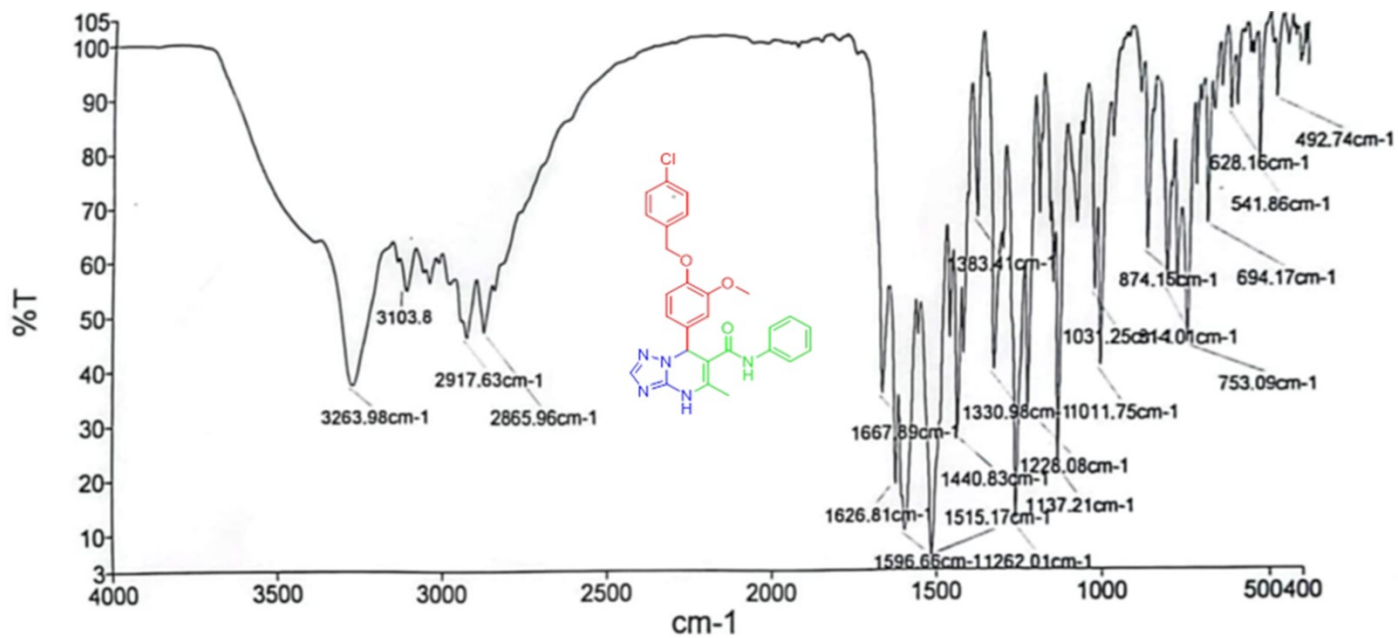

aha-Najafi-P8-1402-3-21

10.157  
9.703  
7.622  
7.518  
7.491  
7.394  
7.233  
6.988  
6.963  
6.934  
6.903  
6.826  
6.708  
6.680  
6.468  
4.987  
3.633  
3.323  
2.478  
2.158

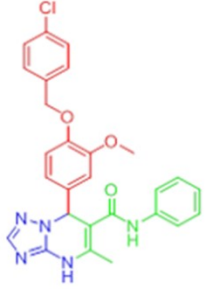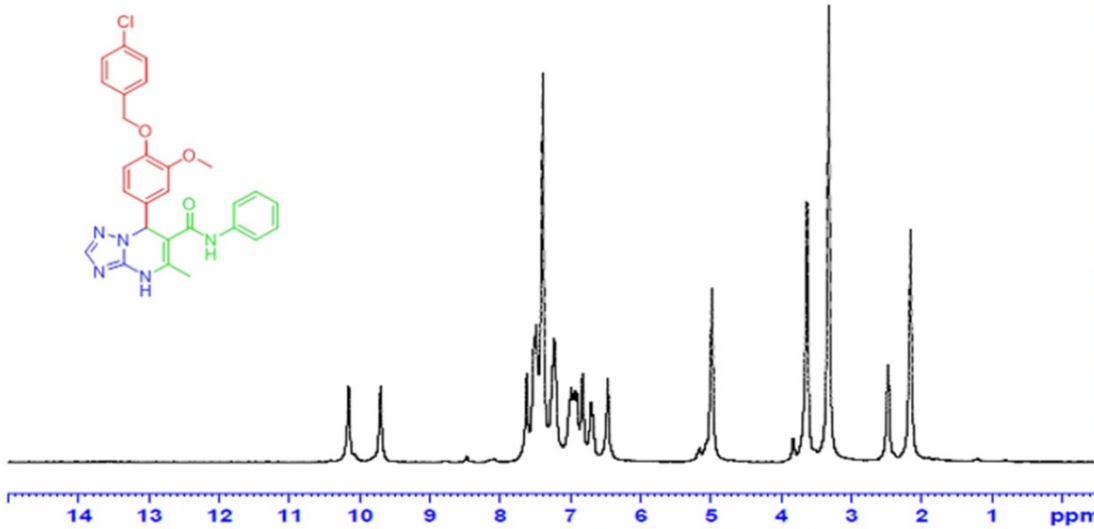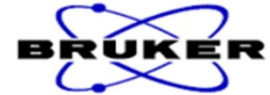

Current Data Parameters  
NAME Hamedan-6  
EXPNO 840  
PROCNO 1

F2 - Acquisition Parameters  
Date\_ 20210612  
Time 12.45  
INSTRUM spect  
PROBHD 5 mm Multinucl  
PULPROG zg  
TD 16384  
SOLVENT DMSO  
NS 16  
DS 0  
SWH 6265.664 Hz  
FIDRES 0.382426 Hz  
AQ 1.3074932 sec  
RG 32  
RW 79.800 usec  
DE 6.00 usec  
TE 300.0 K  
D1 2.00000000 sec

----- CHANNEL f1 -----  
NUC1 1H  
P1 9.00 usec  
PL1 3.00 dB  
SFO1 250.1320010 MHz

F2 - Processing parameters  
SI 32768  
SF 250.1300000 MHz  
WDW RM  
SGB 0  
LB 0.70 Hz  
GB 0  
PC 1.00

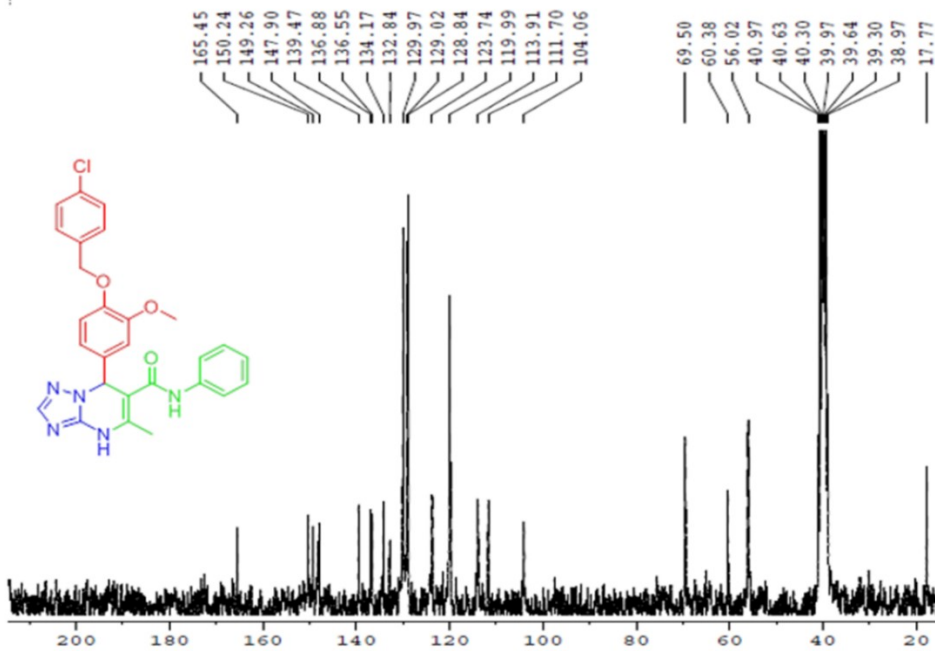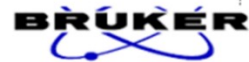

Current Data Parameters  
 NAME Hamedan\_6  
 EXPNO 890  
 PROCNO 1

F2 - Acquisition Parameters  
 Date 20210615  
 Time 13:54  
 INSTRUM spect  
 PROBRD 5 mm Multinucl  
 PULPROG zgpg  
 TD 65536  
 SOLVENT DMSO  
 NS 327  
 DS 0  
 SWH 15060.241 Hz  
 FIDRES 0.229801 Hz  
 AQ 2.1758451 sec  
 RG 1625.5  
 DW 33.200 usec  
 DE 6.00 usec  
 TE 300.0 K  
 D1 2.00000000 sec  
 d11 0.03000000 sec  
 d12 0.00002000 sec

----- CHANNEL f1 -----  
 NUC1 13C  
 P1 10.00 usec  
 PL1 0.00 dB  
 SFO1 62.9015280 MHz

----- CHANNEL f2 -----  
 CPDPRG2 waltz16  
 NUC2 1H  
 PCPD2 80.00 usec  
 PL2 3.00 dB  
 PL12 21.50 dB  
 PL13 23.00 dB  
 SFO2 250.1310005 MHz

F2 - Processing parameters  
 SI 32768  
 SF 62.8952390 MHz  
 WDW EM  
 SSB 0  
 LB 5.00 Hz  
 GB 0  
 PC 1.40

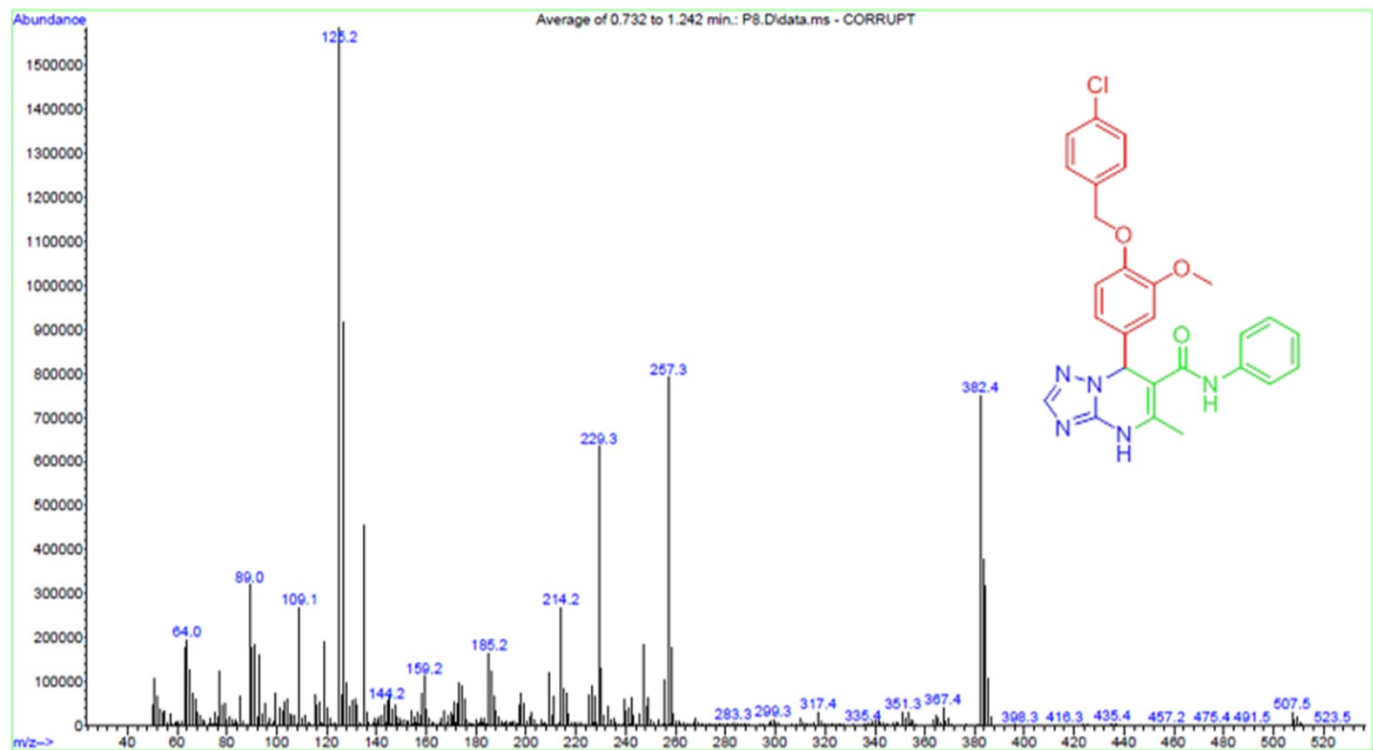

Supplement: d4ra02339k1.pdf [file d4ra02339k1.pdf]
